# Supplementary material for: Metabolic profile of Yi-Xin-Shu capsule in rat by ultra-performance liquid chromatography coupled with quadrupole time-of-flight tandem mass spectrometry analysis
Source: Royal Society of Chemistry journal article supplement (doi:10.1039/c5ra14260a), 2015-01-01
Supplement: c5ra14260a1.pdf [file c5ra14260a1.pdf]

**Metabolic profile of Yi-Xin-Shu capsule in rat by ultra performance  
liquid chromatography coupled with quadrupole time-of-flight  
tandem mass spectrometry analysis**

Hongping Wang, Chang Chen, Yan Liu, Xiaowei Yang, Hongbin Xiao<sup>a</sup>

*Institute of Chinese Materia Medica, China Academy of Chinese Medical Sciences,  
Beijing 100700, China*

**Supplementary Data**

## Content S1 Identification of metabolites of YXS

A total of 62 YXS-related metabolites were tentatively identified in rat biofluids. According to the origins of parent compounds and structural types, all these metabolites were categorized as lignans-related, tanshinone-related and ginsenoside-related compounds (shown in Table S2). The prototype compounds were showed in Table S1.

### 1.1. Identification of lignans-related metabolites

Total 37 lignans-related metabolites were tentatively identified in rat biofluids by comparison with the literature or the fragmentation ions obtained from their MS/MS spectra. All of them were mainly generated from three parent compounds, including Schisandrin A, Schisandrin B and Schisantherin B. Total 11 metabolites, including **M1**, **M2**, **M4**, **M6-M8**, **M10**, **M12**, **M24**, **M26** and **M29** were firstly identified in this study.

**M30** was tentatively identified as Schisandrin A metabolites, which were formed by losses of  $2\text{CH}_2$ . **M1**, **M2** and **M7** showed the precursor ion at  $m/z$  419.1705 ( $\text{C}_{22}\text{H}_{27}\text{O}_8$ ), 30 Da more than that of **M30**. The fragmentation ions at  $m/z$  401.1570, 359.1480, 331.1166 and 316.0931 suggested that  $\text{H}_2\text{O}$ ,  $\text{C}_3\text{H}_6$ , CO and  $\text{CH}_3$  were successively eliminated from  $[\text{M}+\text{H}]^+$ . The MFB from **M30** to **M1**, **M2** as well as **M7** is  $-\text{H}_2+\text{O}_2$ . Based on the data mentioned above, **M1**, **M2** and **M7** were demethylation to carboxylic acid metabolites of **M30**. The MS/MS spectrum of **M2** was shown in Fig. 2 (A). **M4**, **M8**, **M10** and **M12** were observed at  $m/z$  417.1912 ( $\text{C}_{23}\text{H}_{29}\text{O}_7$ ), 16 Da more than that of Schisandrin B. The fragmentation pathways of **M4**, **M8**, **M10** and

**M12** were similar to that of Schisandrin B. Thus, **M4**, **M8**, **M10** and **M12** were oxidation metabolites of Schisandrin B. **M24** and **M26** gave the precursor ion at  $m/z$  415.1755 ( $C_{23}H_{27}O_7$ ), 14 Da more than that of Schisandrin B. The fragmentation ions at  $m/z$  397.1583, 385.1667, 373.1772, 366.1451, 342.1080 and 327.1198 were formed by the individual or combined losses of  $H_2O$ ,  $OCH_2$ ,  $C_3H_6$  or  $OCH_3$ . The MFB from Schisandrin B to **M24** as well as **M26** is  $-H_2+O$ . Thus, **M24** and **M26** were identified as methylene to Ketone metabolites of Schisandrin B. Similarly, **M6** was deduced as metabolite of Schisandrin B and was formed by the loss of  $CH_2$  and di-oxidation. **M29** showed the precursor ion at  $m/z$  485.2172 ( $C_{27}H_{33}O_8$ ), 30 Da less than that of Schisantherin B. The fragmentation ion at  $m/z$  401.1560, 383.1464, 352.1295 and 337.1067 indicating that  $C_6H_{12}$ ,  $H_2O$ ,  $OCH_3$  and  $CH_3$  were successively eliminated from  $[M+H]^+$ . Other fragmentation ions at  $m/z$  371.1483, 341.1015 and 326.1128 were formed by the successively losses of  $OCH_2$ ,  $OCH_2$  and  $CH_3$  from  $[M+H-C_6H_{12}]^+$ . The MFB from Schisandrin B to **M29** is  $-C-H_2-O$ . Based on the data, we deduced **M29** was metabolite of Schisantherin B and was formed by the loss of  $OCH_2$ .

### *1.2. Identification tanshinone-related metabolites*

Total 17 tanshinone-related metabolites were tentatively identified in rat biofluids, shown in Table 2. The detected result suggested that the tanshinone-related metabolites were mainly generated from three parent compounds, including Cryptotanshinone, Tanshinone IIA and Tanshinone I.

**M40-M42** and **M48** showed the precursor ion at  $m/z$  313.1438 ( $C_{19}H_{21}O_4$ ), 16 Da more than that of Cryptotanshinone. The fragmentation ions of **M40-M42** were

observed at  $m/z$  285.1472, 267.1397 and 252.1150, which were formed via the successive losses of CO, H<sub>2</sub>O and CH<sub>3</sub> from [M+H]<sup>+</sup>. The fragmentation ion at  $m/z$  254.1301[M+H-CO-CH<sub>2</sub>OH]<sup>+</sup> indicated that there was a CH<sub>2</sub>OH in the structure. Different from **M40-M42**, the fragmentation ions of **M48** were observed at  $m/z$  295.1437, 277.1348 and 262.1104, which were formed via the successive losses of H<sub>2</sub>O, H<sub>2</sub>O and CH<sub>3</sub>. The MFB from Cryptotanshinone to **M40-M42** as well as **M48** is +O. Thus, **M40-M42** and **M48** were deduced as Hydroxylation metabolites of Cryptotanshinone. The hydroxylation positions of **M40-M42** were CH<sub>3</sub> group while **M48** was CH<sub>2</sub> group. **M43**, **M46**, **M47** and **M51** showed the precursor ion at  $m/z$  329.1387, 16 Da more than that of **M48**. Due to the fragmentation pathway was similar to that of **M48** and the MFB from **M48** to **M43**, **M46**, **M47** as well as **M51** is +O, we deduced that **M43**, **M46**, **M47** and **M51** were di-hydroxylation metabolites of Cryptotanshinone. Similarly, **M38** was deduced as tri-hydroxylation Cryptotanshinone due to it was 16 Da more than di-hydroxylation Cryptotanshinone and owned the same fragmentation pathway as **M43**, **M46**, **M47** and **M51**. The MS/MS spectrum was shown in Fig. 2(B).

**M39** and **M45** gave the precursor ion at  $m/z$  293.0816, 16 Da more than that of Tanshinone I. In their MS/MS spectra, the fragmentation ions were observed at  $m/z$  265.1137, 234.0703 and 219.0817, indicating CO, CH<sub>2</sub>OH and CH<sub>3</sub> were successively eliminated from [M+H]<sup>+</sup>. The MFB from Tanshinone I to them is +O. Based on the data, **M39** and **M45** were deduced as hydroxylation metabolites of Tanshinone I. **M50** gave the precursor ion at  $m/z$  311.1281, 16 Da more than that of Tanshinone II A. In

the MS/MS spectra, the fragmentation ions were observed at  $m/z$  283.1337, 265.1218, 250.0992 and 222.1018 indicating that  $H_2O$ ,  $H_2O$ ,  $CH_3$  and  $CO$  were successively eliminated from  $[M+H]^+$ . The MFB from Tanshinone II A to **M50** is +O. Thus, **M50** was deduced as hydroxylation metabolite of Tanshinone II A. In the same way, **M42** was assigned as di-hydroxylation metabolite of Tanshinone II A. **M52** showed the precursor ion at  $m/z$  293.1176, 2 Da less than that of Tanshinone II A. Due to the fragmentation pathway of **M52** was similar to that of Tanshinone II A, **M52** was deduced as dehydrogenation metabolite of Tanshinone II A. **M49** gave the precursor ion at  $m/z$  327.1231, 16 Da more than that of Tanshinone II B. In the MS/MS spectra, the fragmentation ion at  $m/z$  309.1124 and 281.1178 suggesting  $H_2O$ ,  $CO$  were successively eliminated from  $[M+H]^+$ . The fragmentation ion at  $m/z$  250.1091 $[M+H-H_2O-CO-CH_2OH]^+$  indicating that there is  $CH_2OH$  in the structure. The MFB from Tanshinone II B to **M49** is +O. Thus, **M49** was deduced as hydroxylation metabolite of Tanshinone II B.

### *1.3. Identification ginsenoside-related metabolites*

10 ginsenoside-related metabolites were detected from the drug-containing plasma, feces samples as well as urine sample, shown in Table 2. The results suggested that almost all of the detected metabolites were secondary glycosides, which were formed by sequential deglycosylation metabolites in intestine. According to the structural types of ginsenosides, they were generally divided into three groups, including (20*S*)-protopanaxatriols type (Group I), (20*S*)-protopanaxadiols type (Group II) and oleananes type (Group III), which yielded the characteristic aglycone

ions at  $m/z$  475.3787, 459.3848 and 455.3510, respectively.

Metabolites **M54** and **M58** yielded the characteristic aglycone ion at  $m/z$  475.3817, indicating that they were (20*S*)-protopanaxatriols type ginsenosides. **M54** and **M58** were assigned as ginsenoside F<sub>1</sub> or its isomer as it showed the adduct ion at  $m/z$  683.4382, which was 162 Da (Glc) more than that of aglycone ion. **M53** showed the deprotonated ion at  $m/z$  1123.5893, 16 Da more than that of ginsenoside Rb<sub>1</sub>. The fragmentation ions at  $m/z$  961.5382, 799.4846, 637.4310 and 475.3780 were formed by the successive losses of Glc from [M-H]<sup>-</sup>. Due to **M53** was absent from YXS but presented in the rat biofluid, **M53** was deduced as metabolite of ginsenoside. The MFB from ginsenoside Rb<sub>1</sub> to **M53** is +O. Therefore, **M53** was assigned as oxidation metabolite of ginsenoside Rb<sub>1</sub>.

Metabolites **M55-M57** and **M59** yielded the characteristic aglycone ion at  $m/z$  459.3849, indicating that they were (20*S*)-protopanaxadiols type ginsenosides. The fragmentation pathways were similar to those of ginsenoside Rd. Thus, **M56**, **M57** and **M59** were tentatively deduced as Rd isomer.

Metabolites **M60-M62** yielded the characteristic aglycone ion at  $m/z$  455.3525, indicating that they were oleananes type compounds. **M60** gave the deprotonated ion at  $m/z$  793.4381, 162 Da less than ginsenoside Ro. After Glc being eliminated, the fragmentation pathway of ginsenoside Ro was similar to that of **M60**. Thus, **M60** was tentatively deduced as Glc removal metabolite of ginsenoside Ro. The MS/MS spectrum of **M60** was shown in Fig. 2(C). Similarly, **M61** and **M62** were tentatively deduced as 2Glc removal metabolites of ginsenoside Ro and Ro isomer, respectively.

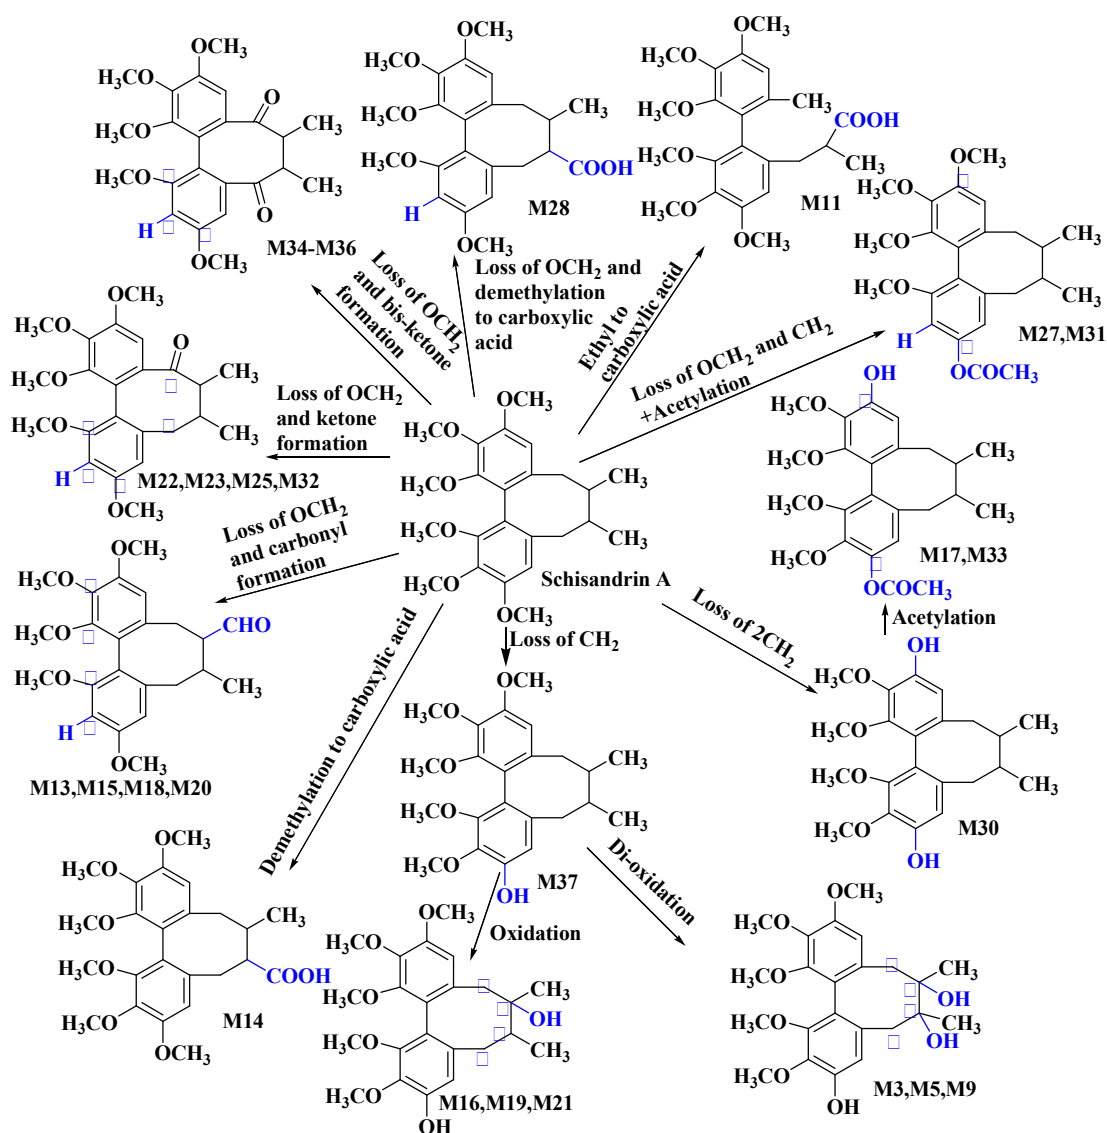

Fig. S1 The metabolic pathways of Schisandrins A.

**Table S1** The prototype compounds detected in rat biofluids.

| No.                          | t <sub>R</sub><br>(min) | Molecular<br>formula                            | Measured<br>value ( <i>m/z</i> )<br>[M+H] <sup>+</sup> | Diff<br>(ppm) | Compound name                                                                           | Source  |
|------------------------------|-------------------------|-------------------------------------------------|--------------------------------------------------------|---------------|-----------------------------------------------------------------------------------------|---------|
| <i>Prototype lignans</i>     |                         |                                                 |                                                        |               |                                                                                         |         |
| 1                            | 8.85                    | C <sub>28</sub> H <sub>34</sub> O <sub>10</sub> | 548.2493 <sup>b</sup>                                  | -0.55         | Gomisin D isomer                                                                        | P       |
| 2                            | 9.37                    | C <sub>24</sub> H <sub>32</sub> O <sub>7</sub>  | 433.2223                                               | -0.69         | Schizandrol A <sup>a</sup>                                                              | P, U    |
| 3                            | 9.63                    | C <sub>28</sub> H <sub>34</sub> O <sub>10</sub> | 548.2501 <sup>b</sup>                                  | 0.91          | Gomisin D                                                                               | P, U, F |
| 4                            | 10.05                   | C <sub>24</sub> H <sub>32</sub> O <sub>7</sub>  | 433.2226                                               | 0             | Schizandrol A isomer                                                                    | P       |
| 5                            | 10.15                   | C <sub>22</sub> H <sub>28</sub> O <sub>6</sub>  | 389.1962                                               | -0.51         | Gomisin J                                                                               | F       |
| 6                            | 10.34                   | C <sub>22</sub> H <sub>28</sub> O <sub>6</sub>  | 389.1963                                               | -0.26         | Gomisin J isomer                                                                        | F       |
| 7                            | 10.57                   | C <sub>29</sub> H <sub>38</sub> O <sub>9</sub>  | 548.2858 <sup>b</sup>                                  | -0.36         | Tigloyl gomisin Q/Angeloyl gomisin                                                      | P, F    |
| 8                            | 10.72                   | C <sub>23</sub> H <sub>28</sub> O <sub>6</sub>  | 401.1967                                               | 0.75          | Kadsuranin/isomer                                                                       | U       |
| 9                            | 10.97                   | C <sub>23</sub> H <sub>28</sub> O <sub>6</sub>  | 401.1966                                               | 0.50          | Kadsuranin/isomer                                                                       | P, U    |
| 10                           | 10.98                   | C <sub>29</sub> H <sub>38</sub> O <sub>9</sub>  | 548.2861 <sup>b</sup>                                  | 0.18          | Tigloyl gomisin Q/Angeloyl gomisin Q                                                    | P       |
| 11                           | 11.24                   | C <sub>22</sub> H <sub>28</sub> O <sub>6</sub>  | 389.1966                                               | 0.51          | Gomisin J isomer                                                                        | F       |
| 12                           | 11.24                   | C <sub>31</sub> H <sub>36</sub> O <sub>9</sub>  | 570.2708 <sup>b</sup>                                  | 0.88          | Benzoyl isogomisin Q                                                                    | P       |
| 13                           | 11.37                   | C <sub>29</sub> H <sub>38</sub> O <sub>9</sub>  | 548.2865 <sup>b</sup>                                  | 0.91          | Tigloyl gomisin Q isomer/Angeloyl gomisin Q isomer                                      | P, F    |
| 14                           | 11.80                   | C <sub>23</sub> H <sub>30</sub> O <sub>6</sub>  | 403.2118                                               | -0.74         | (-) Gomisin K <sub>1</sub>                                                              | F       |
| 15                           | 11.95                   | C <sub>23</sub> H <sub>30</sub> O <sub>6</sub>  | 403.2117                                               | -0.99         | (+) Gomisin K <sub>2</sub>                                                              | F       |
| 16                           | 12.04                   | C <sub>28</sub> H <sub>34</sub> O <sub>9</sub>  | 532.2548 <sup>b</sup>                                  | 0.19          | Schisantherin B                                                                         | P, U    |
| 17                           | 12.20                   | C <sub>23</sub> H <sub>30</sub> O <sub>6</sub>  | 403.2120                                               | -0.25         | (-) Gomisin K <sub>1</sub> isomer/(+) Gomisin K <sub>2</sub> isomer                     | F       |
| 18                           | 12.26                   | C <sub>24</sub> H <sub>32</sub> O <sub>6</sub>  | 554.2388 <sup>b</sup>                                  | -0.36         | Schisantherin A <sup>a</sup>                                                            | P, U    |
| 19                           | 12.40                   | C <sub>28</sub> H <sub>34</sub> O <sub>9</sub>  | 532.2542 <sup>b</sup>                                  | -0.94         | Schisantherin B isomer                                                                  | P, F    |
| 20                           | 12.85                   | C <sub>23</sub> H <sub>30</sub> O <sub>6</sub>  | 403.2118                                               | -0.74         | Schisanhenol                                                                            | U       |
| 21                           | 13.50                   | C <sub>28</sub> H <sub>34</sub> O <sub>9</sub>  | 515.2286                                               | 0.97          | Gomisin E                                                                               | F       |
| 22                           | 14.62                   | C <sub>24</sub> H <sub>32</sub> O <sub>6</sub>  | 417.2281                                               | 0.96          | Schisandrin A <sup>a</sup>                                                              | P, F    |
| 23                           | 15.16                   | C <sub>23</sub> H <sub>28</sub> O <sub>6</sub>  | 401.1965                                               | 0.25          | Gomisin N                                                                               | U       |
| 24                           | 15.31                   | C <sub>23</sub> H <sub>28</sub> O <sub>6</sub>  | 401.1964                                               | 0             | Schisandrin B <sup>a</sup>                                                              | P, F    |
| <i>Prototype tanshinones</i> |                         |                                                 |                                                        |               |                                                                                         |         |
| 25                           | 5.84                    | C <sub>18</sub> H <sub>16</sub> O <sub>5</sub>  | 313.1076                                               | 0             | Tanshindiol B/Tanshindiol C                                                             | P, F    |
| 26                           | 7.36                    | C <sub>19</sub> H <sub>20</sub> O <sub>4</sub>  | 313.1438                                               | -0.64         | 1,2,6,7,8,9-Hexahydro-1,6,6-trimethyl-3,11-dioxanaphth[2,1-e]azulene-10,12-dione/isomer | P, F    |
| 27                           | 7.80                    | C <sub>19</sub> H <sub>20</sub> O <sub>4</sub>  | 313.1437                                               | -0.96         | 1β-Hydroxy cryptotanshinone                                                             | P, F    |
| 28                           | 8.62                    | C <sub>18</sub> H <sub>14</sub> O <sub>4</sub>  | 295.0969                                               | -0.34         | 1,2-Dihydro-1,6-dimethylfuro[3,2-c]naphth[2,1-e]oxepin-10,12-dione                      | P, F    |
| 29                           | 8.77                    | C <sub>19</sub> H <sub>18</sub> O <sub>4</sub>  | 311.1280                                               | -0.96         | 6,7,8,9-Tetrahydro-1,6,6-trimethylfuro[3,2-c]naphth[2,1-e]exepine-10,12-dione           | P, F    |
| 30                           | 8.92                    | C <sub>19</sub> H <sub>18</sub> O <sub>4</sub>  | 311.1281                                               | -0.64         | 6,7,8,9-Tetrahydro-1,6,6-trimethylfuro[3,2-c]naphth[2,1-e]exepine-10,12-dione isomer    | P, F    |
| 31                           | 9.02                    | C <sub>19</sub> H <sub>18</sub> O <sub>4</sub>  | 311.1286                                               | 0.96          | 1-Oxo cryptotanshinone                                                                  | P, F    |
| 32                           | 9.10                    | C <sub>19</sub> H <sub>18</sub> O <sub>4</sub>  | 311.1279                                               | -1.29         | Tanshinone II B                                                                         | P, F    |



|                               |       |                                                  |                       |       |                                                               |         |
|-------------------------------|-------|--------------------------------------------------|-----------------------|-------|---------------------------------------------------------------|---------|
| 33                            | 9.20  | C <sub>19</sub> H <sub>18</sub> O <sub>4</sub>   | 311.1281              | -0.64 | Hydroxytanshinone II A/3 $\alpha$ -Hydroxy<br>tanshinone II A | P, F    |
| 34                            | 9.60  | C <sub>18</sub> H <sub>16</sub> O <sub>4</sub>   | 297.1128              | 0.34  | Tanshinone VI                                                 | P, F    |
| 35                            | 10.40 | C <sub>18</sub> H <sub>14</sub> O <sub>3</sub>   | 279.1025              | 1.43  | 1,2-Dihydro-tanshinquinone I /15,16-<br>Dihydrotanshinone     | P, F    |
| 36                            | 10.85 | C <sub>18</sub> H <sub>16</sub> O <sub>3</sub>   | 281.1174              | -1.42 | Danshenxinkun B                                               | P, F    |
| 37                            | 11.22 | C <sub>20</sub> H <sub>18</sub> O <sub>5</sub>   | 339.1231              | -0.25 | Methyl tanshinonate                                           | P, F    |
| 38                            | 12.32 | C <sub>18</sub> H <sub>12</sub> O <sub>3</sub>   | 277.0860              | -1.8  | Tanshinone I <sup>a</sup>                                     | P, F    |
| 39                            | 12.45 | C <sub>19</sub> H <sub>20</sub> O <sub>3</sub>   | 297.1489              | -0.67 | Cryptotanshinone <sup>a</sup>                                 | P, F    |
| 40                            | 13.83 | C <sub>19</sub> H <sub>16</sub> O <sub>3</sub>   | 293.1180              | 0.68  | Unknown                                                       | P, F    |
| 41                            | 14.72 | C <sub>19</sub> H <sub>18</sub> O <sub>3</sub>   | 295.1336              | 0.68  | Tanshinone II A <sup>a</sup>                                  | P, F    |
| <i>Prototype ginsenosides</i> |       |                                                  |                       |       |                                                               |         |
| 42                            | 4.06  | C <sub>54</sub> H <sub>92</sub> O <sub>23</sub>  | 1107.5926             | -2.26 | Unknown                                                       | P       |
| 43                            | 4.18  | C <sub>48</sub> H <sub>82</sub> O <sub>19</sub>  | 961.5382              | 1.04  | Re <sub>3</sub> <sup>a</sup>                                  | P       |
| 44                            | 4.21  | C <sub>54</sub> H <sub>92</sub> O <sub>23</sub>  | 1107.5961             | 0.90  | Unknown                                                       | P       |
| 45                            | 4.36  | C <sub>47</sub> H <sub>80</sub> O <sub>18</sub>  | 931.5275              | 0.97  | Re <sub>4</sub>                                               | P       |
| 46                            | 4.40  | C <sub>48</sub> H <sub>82</sub> O <sub>19</sub>  | 961.5358              | -1.46 | 20-Gluco-ginsenoside Rf <sup>a</sup>                          | P       |
| 47                            | 4.50  | C <sub>47</sub> H <sub>80</sub> O <sub>18</sub>  | 931.5262              | -0.43 | Notoginsenoside R <sub>1</sub> isomer                         | P       |
| 48                            | 4.53  | C <sub>48</sub> H <sub>82</sub> O <sub>19</sub>  | 961.5360              | -1.25 | Re <sub>1</sub>                                               | P       |
| 49                            | 4.58  | C <sub>47</sub> H <sub>80</sub> O <sub>18</sub>  | 931.5275              | 0.97  | Notoginsenoside R <sub>1</sub> <sup>a</sup>                   | P       |
| 50                            | 4.63  | C <sub>48</sub> H <sub>82</sub> O <sub>19</sub>  | 961.5380              | 0.83  | Re <sub>2</sub>                                               | P       |
| 51                            | 4.71  | C <sub>54</sub> H <sub>92</sub> O <sub>23</sub>  | 1107.5954             | 0.27  | Unknown                                                       | P       |
| 52                            | 4.90  | C <sub>48</sub> H <sub>82</sub> O <sub>18</sub>  | 945.5433              | 1.06  | Re <sup>a</sup>                                               | P, U, F |
| 53                            | 4.93  | C <sub>42</sub> H <sub>72</sub> O <sub>14</sub>  | 799.4863              | 2.38  | Rg <sub>1</sub> <sup>a</sup>                                  | P, U, F |
| 54                            | 5.30  | C <sub>54</sub> H <sub>92</sub> O <sub>24</sub>  | 1123.5864             | -3.20 | Koryoginsenoside R <sub>2</sub> isomer                        | P, F    |
| 55                            | 5.38  | C <sub>53</sub> H <sub>90</sub> O <sub>23</sub>  | 1093.5785             | -0.91 | Floralginsenoside P/isomer                                    | P, F    |
| 56                            | 5.46  | C <sub>54</sub> H <sub>92</sub> O <sub>24</sub>  | 1123.5867             | -2.94 | Koryoginsenoside R <sub>2</sub>                               | F       |
| 57                            | 5.60  | C <sub>54</sub> H <sub>92</sub> O <sub>24</sub>  | 1123.5865             | -3.12 | Koryoginsenoside R <sub>2</sub> isomer                        | F       |
| 58                            | 5.63  | C <sub>53</sub> H <sub>90</sub> O <sub>23</sub>  | 1093.5769             | -2.38 | Floralginsenoside P/isomer                                    | P, F    |
| 59                            | 5.75  | C <sub>41</sub> H <sub>70</sub> O <sub>13</sub>  | 815.4806 <sup>c</sup> | 1.59  | Ginsenoside F <sub>3</sub> /Ginsenoside F <sub>5</sub>        | P       |
| 60                            | 5.78  | C <sub>53</sub> H <sub>90</sub> O <sub>23</sub>  | 1093.5776             | -1.74 | Floralginsenoside P/isomer                                    | P, F    |
| 61                            | 5.90  | C <sub>53</sub> H <sub>90</sub> O <sub>23</sub>  | 1093.5770             | -2.29 | Floralginsenoside P/isomer                                    | P       |
| 62                            | 5.91  | C <sub>48</sub> H <sub>82</sub> O <sub>19</sub>  | 961.5382              | 1.04  | Notoginsenoside N isomer                                      | P, F    |
| 63                            | 6.10  | C <sub>48</sub> H <sub>82</sub> O <sub>19</sub>  | 961.5367              | -0.52 | Notoginsenoside N                                             | P, U, F |
| 64                            | 6.20  | C <sub>48</sub> H <sub>82</sub> O <sub>19</sub>  | 961.5380              | 0.83  | Vinaginsenoside R <sub>4</sub>                                | P, U, F |
| 65                            | 6.26  | C <sub>60</sub> H <sub>102</sub> O <sub>28</sub> | 1269.6467             | -0.95 | Unknown                                                       | F       |
| 66                            | 6.50  | C <sub>60</sub> H <sub>102</sub> O <sub>28</sub> | 1269.6459             | -1.58 | Unknown                                                       | F       |
| 67                            | 6.63  | C <sub>42</sub> H <sub>72</sub> O <sub>14</sub>  | 799.4857              | 1.63  | Rf isomer                                                     | P       |
| 68                            | 6.78  | C <sub>42</sub> H <sub>72</sub> O <sub>14</sub>  | 799.4866              | 2.75  | Rf <sup>a</sup>                                               | P, U, F |
| 69                            | 6.90  | C <sub>60</sub> H <sub>102</sub> O <sub>28</sub> | 1269.6444             | -2.76 | Unknown                                                       | F       |
| 70                            | 6.93  | C <sub>41</sub> H <sub>70</sub> O <sub>13</sub>  | 769.4767              | 3.77  | Notoginsenoside R <sub>2</sub> <sup>a</sup>                   | P       |
| 71                            | 6.97  | C <sub>58</sub> H <sub>98</sub> O <sub>26</sub>  | 1209.6230             | -3.14 | Ra <sub>2</sub> <sup>a</sup>                                  | P       |
| 72                            | 7.00  | C <sub>59</sub> H <sub>100</sub> O <sub>27</sub> | 1239.6343             | -2.50 | Ra <sub>3</sub> <sup>a</sup>                                  | P       |
| 73                            | 7.06  | C <sub>54</sub> H <sub>92</sub> O <sub>23</sub>  | 1107.5965             | 1.26  | Rb <sub>1</sub> <sup>a</sup>                                  | P, U, F |

|                             |       |                                                  |                        |       |                                                                          |         |
|-----------------------------|-------|--------------------------------------------------|------------------------|-------|--------------------------------------------------------------------------|---------|
| 74                          | 7.13  | C <sub>48</sub> H <sub>76</sub> O <sub>19</sub>  | 955.4890               | -1.36 | Ro isomer                                                                | P       |
| 75                          | 7.24  | C <sub>42</sub> H <sub>72</sub> O <sub>13</sub>  | 783.4927               | 4.08  | Rg <sub>2</sub> <sup>a</sup>                                             | P, U, F |
| 76                          | 7.27  | C <sub>58</sub> H <sub>98</sub> O <sub>26</sub>  | 1209.6232              | -2.98 | Ra <sub>1</sub> <sup>a</sup>                                             | P       |
| 77                          | 7.30  | C <sub>53</sub> H <sub>90</sub> O <sub>22</sub>  | 1077.5852              | 0.65  | Rc <sup>a</sup>                                                          | P, U, F |
| 78                          | 7.33  | C <sub>42</sub> H <sub>72</sub> O <sub>13</sub>  | 783.4925               | 3.83  | 20(R)-Rg <sub>2</sub> <sup>a</sup>                                       | P, U, F |
| 79                          | 7.33  | C <sub>48</sub> H <sub>76</sub> O <sub>19</sub>  | 955.4921               | 1.88  | Ro <sup>a</sup>                                                          | P, U, F |
| 80                          | 7.38  | C <sub>36</sub> H <sub>62</sub> O <sub>9</sub>   | 637.4326               | 1.57  | Rh <sub>1</sub> <sup>a</sup>                                             | P, U, F |
| 81                          | 7.50  | C <sub>48</sub> H <sub>76</sub> O <sub>19</sub>  | 955.4874               | -3.04 | Ro isomer                                                                | P, U, F |
| 82                          | 7.53  | C <sub>53</sub> H <sub>90</sub> O <sub>22</sub>  | 1077.5847              | 0.19  | Rb <sub>2</sub> <sup>a</sup>                                             | P, U, F |
| 83                          | 7.60  | C <sub>53</sub> H <sub>90</sub> O <sub>22</sub>  | 1077.5841              | -0.37 | Rb <sub>3</sub> <sup>a</sup>                                             | P, U, F |
| 84                          | 7.78  | C <sub>56</sub> H <sub>94</sub> O <sub>24</sub>  | 1149.6035              | -1.91 | Quinquenoside R <sub>1</sub> <sup>a</sup>                                | P, U, F |
| 85                          | 7.78  | C <sub>54</sub> H <sub>92</sub> O <sub>23</sub>  | 1107.5950              | -0.09 | Rb <sub>1</sub> isomer                                                   | U, F    |
| 86                          | 7.78  | C <sub>47</sub> H <sub>74</sub> O <sub>18</sub>  | 925.4803               | 0.65  | Pseudo-ginsenoside-RT <sub>1</sub> /Chikusetsusaponin IV                 | U, F    |
| 87                          | 8.03  | C <sub>55</sub> H <sub>92</sub> O <sub>23</sub>  | 1119.5946              | -0.45 | Rs <sub>2</sub> <sup>a</sup>                                             | P       |
| 88                          | 8.10  | C <sub>48</sub> H <sub>82</sub> O <sub>18</sub>  | 945.5447               | 2.54  | Rd <sup>a</sup>                                                          | P, U, F |
| 89                          | 8.16  | C <sub>51</sub> H <sub>84</sub> O <sub>21</sub>  | 1031.5428              | 0.10  | Malonyl-ginsenoside Rd                                                   | F       |
| 90                          | 8.18  | C <sub>56</sub> H <sub>94</sub> O <sub>24</sub>  | 1149.6034              | -2.00 | Quinquenoside R <sub>1</sub> isomer                                      | U       |
| 91                          | 8.33  | C <sub>44</sub> H <sub>74</sub> O <sub>14</sub>  | 825.5020               | 2.42  | Acetyl-Rg <sub>2</sub>                                                   | U, F    |
| 92                          | 8.45  | C <sub>48</sub> H <sub>82</sub> O <sub>18</sub>  | 945.5430               | 0.74  | Rd isomer                                                                | P, U, F |
| 93                          | 8.50  | C <sub>50</sub> H <sub>84</sub> O <sub>19</sub>  | 987.5543               | 1.42  | Acetyl-Rd/isomer                                                         | U, F    |
| 94                          | 8.56  | C <sub>49</sub> H <sub>78</sub> O <sub>19</sub>  | 1015.5110 <sup>c</sup> | -0.39 | Ginsenoside Ro methyl ester <sup>a</sup>                                 | P       |
| 95                          | 8.66  | C <sub>48</sub> H <sub>82</sub> O <sub>18</sub>  | 945.5415               | -0.85 | Gypenoside X VII                                                         | U, F    |
| 96                          | 8.75  | C <sub>47</sub> H <sub>80</sub> O <sub>17</sub>  | 915.5316               | -0.11 | Vinaginsenoside R <sub>16</sub>                                          | P, U, F |
| 97                          | 8.81  | C <sub>50</sub> H <sub>84</sub> O <sub>19</sub>  | 987.5555               | 2.63  | Pseudo-ginsenoside RC <sub>1</sub>                                       | U, F    |
| 98                          | 8.86  | C <sub>47</sub> H <sub>80</sub> O <sub>17</sub>  | 915.5326               | 0.98  | Gypenoside IX                                                            | U, F    |
| 99                          | 8.96  | C <sub>47</sub> H <sub>80</sub> O <sub>17</sub>  | 961.5372 <sup>c</sup>  | 0     | Notoginsenoside Fe                                                       | P, U, F |
| 100                         | 9.11  | C <sub>50</sub> H <sub>84</sub> O <sub>19</sub>  | 987.5536               | 0.71  | Acetyl-gypenoside X VII                                                  | U, F    |
| 101                         | 9.18  | C <sub>50</sub> H <sub>84</sub> O <sub>19</sub>  | 987.5531               | 0.20  | Acetyl-gypenoside X VII isomer                                           | U, F    |
| 102                         | 9.46  | C <sub>47</sub> H <sub>74</sub> O <sub>18</sub>  | 925.4829               | 3.46  | Pseudo-ginsenoside-RT <sub>1</sub><br>isomer/Chikusetsusaponin IV isomer | P       |
| 103                         | 9.51  | C <sub>42</sub> H <sub>66</sub> O <sub>14</sub>  | 793.4404               | 3.78  | Chikusetsusaponin IVa <sup>a</sup>                                       | P, U, F |
| 104                         | 9.63  | C <sub>42</sub> H <sub>72</sub> O <sub>13</sub>  | 783.4926               | 3.96  | Ginsenoside F <sub>2</sub>                                               | P, U, F |
| 105                         | 10.09 | C <sub>42</sub> H <sub>72</sub> O <sub>13</sub>  | 783.4895               | 0     | Rg <sub>3</sub> <sup>a</sup>                                             | P, U, F |
| 106                         | 10.16 | C <sub>42</sub> H <sub>72</sub> O <sub>13</sub>  | 783.4920               | 3.19  | (20R)-Rg <sub>3</sub> <sup>a</sup>                                       | P, U, F |
| 107                         | 11.12 | C <sub>44</sub> H <sub>74</sub> O <sub>14</sub>  | 871.5062 <sup>c</sup>  | 0.80  | Acetyl-(S/R)-Rg <sub>3</sub> /isomer                                     | U, F    |
| 108                         | 11.32 | C <sub>44</sub> H <sub>74</sub> O <sub>14</sub>  | 871.5063 <sup>c</sup>  | 0.92  | Acetyl-(S/R)-Rg <sub>3</sub> /isomer                                     | U, F    |
| 109                         | 11.90 | C <sub>65</sub> H <sub>100</sub> O <sub>21</sub> | 1215.6633              | -3.78 | Polyacetyleneginsenoside-Ro/isomer                                       | U, F    |
| 110                         | 12.12 | C <sub>65</sub> H <sub>100</sub> O <sub>21</sub> | 1215.6639              | -3.29 | Polyacetyleneginsenoside-Ro/isomer                                       | U, F    |
| 111                         | 13.35 | C <sub>36</sub> H <sub>62</sub> O <sub>8</sub>   | 667.4445 <sup>c</sup>  | 3.60  | Rh <sub>2</sub> <sup>a</sup>                                             | U, F    |
| 112                         | 13.52 | C <sub>36</sub> H <sub>62</sub> O <sub>8</sub>   | 667.4443 <sup>c</sup>  | 3.30  | 20(R)-Rh <sub>2</sub> <sup>a</sup>                                       | U, F    |
| <i>Prototype flavonoids</i> |       |                                                  |                        |       |                                                                          |         |
| 113                         | 2.99  | C <sub>21</sub> H <sub>20</sub> O <sub>10</sub>  | 433.1147               | 2.77  | Vitexin <sup>a</sup>                                                     | U       |
| 114                         | 5.36  | C <sub>16</sub> H <sub>12</sub> O <sub>5</sub>   | 285.0749               | -4.91 | Calycosin                                                                | U, F    |
| <i>Prototype lactones</i>   |       |                                                  |                        |       |                                                                          |         |

|                                                      |       |                                                 |                       |       |                                                      |         |
|------------------------------------------------------|-------|-------------------------------------------------|-----------------------|-------|------------------------------------------------------|---------|
| 115                                                  | 7.33  | C <sub>12</sub> H <sub>12</sub> O <sub>2</sub>  | 189.0911              | -2.64 | 3-Butylidenephthalide                                | P, U, F |
| 116                                                  | 14.41 | C <sub>12</sub> H <sub>12</sub> O <sub>3</sub>  | 205.0861              | -1.95 | Senkyunolide B/C/E                                   | P, U, F |
| <i>Prototype phenolicacids and triterpenoid acid</i> |       |                                                 |                       |       |                                                      |         |
| 117                                                  | 4.10  | C <sub>26</sub> H <sub>22</sub> O <sub>10</sub> | 493.1151              | 3.24  | Salvianolic acid A                                   | U, F    |
| 118                                                  | 4.45  | C <sub>36</sub> H <sub>30</sub> O <sub>16</sub> | 717.1466              | 1.39  | Salvianolic acid B                                   | U, F    |
| 119                                                  | 11.72 | C <sub>30</sub> H <sub>48</sub> O <sub>3</sub>  | 455.3529              | 0.88  | Ursolic acid/Oleanlic acid                           | U, F    |
| <i>Prototype astragalus saponins</i>                 |       |                                                 |                       |       |                                                      |         |
| 120                                                  | 6.66  | C <sub>41</sub> H <sub>70</sub> O <sub>14</sub> | 785.4726              | 4.96  | Cyclocanthoside E                                    | U, F    |
| 121                                                  | 7.41  | C <sub>47</sub> H <sub>78</sub> O <sub>19</sub> | 991.5133 <sup>c</sup> | 1.92  | Astragaloside V/Astragaloside<br>VI/AstragalosideVII | U, F    |
| 122                                                  | 7.88  | C <sub>41</sub> H <sub>68</sub> O <sub>14</sub> | 829.4621 <sup>c</sup> | 4.22  | Astragaloside IV <sup>a</sup>                        | P, U, F |

*a*: The compounds were identified by comparison with the reference standards; *b*: [M+NH<sub>4</sub>]<sup>+</sup>; *c*: [M+HCOO]<sup>-</sup>.

**Table S2** The metabolites detected in rat biofluids.

| No.                                | t <sub>R</sub><br>(min) | Molecular<br>formula                           | Measured<br>value ( <i>m/z</i> )<br>[M+H] <sup>+</sup> | Diff<br>(ppm) | Product ions                                                                                                                                                                                                                                                                                                                                                                                                                                                                                                                                                                               | Compound<br>name                                                                       | Source |
|------------------------------------|-------------------------|------------------------------------------------|--------------------------------------------------------|---------------|--------------------------------------------------------------------------------------------------------------------------------------------------------------------------------------------------------------------------------------------------------------------------------------------------------------------------------------------------------------------------------------------------------------------------------------------------------------------------------------------------------------------------------------------------------------------------------------------|----------------------------------------------------------------------------------------|--------|
| <i>Lignans-related metabolites</i> |                         |                                                |                                                        |               |                                                                                                                                                                                                                                                                                                                                                                                                                                                                                                                                                                                            |                                                                                        |        |
| M1                                 | 5.33                    | C <sub>22</sub> H <sub>26</sub> O <sub>8</sub> | 419.1705                                               | -0.23         | 401.1697[M+H-H <sub>2</sub> O] <sup>+</sup> ,<br>386.1470[M+H-H <sub>2</sub> O-CH <sub>3</sub> ] <sup>+</sup> ,<br>359.1595[M+H-H <sub>2</sub> O-C <sub>3</sub> H <sub>6</sub> ] <sup>+</sup> ,<br>344.1353[M+H-H <sub>2</sub> O-C <sub>3</sub> H <sub>6</sub> -CH <sub>3</sub> ] <sup>+</sup> ,<br>331.1283[M+H-H <sub>2</sub> O-C <sub>3</sub> H <sub>6</sub> -CO] <sup>+</sup> ,<br>316.1050[M+H-H <sub>2</sub> O-C <sub>3</sub> H <sub>6</sub> -CO-CH <sub>3</sub> ] <sup>+</sup>                                                                                                      | Schisandrin A<br>2CH <sub>2</sub> +demmet<br>hylation to<br>carboxylic acid            | P, U   |
| M2                                 | 5.37                    | C <sub>22</sub> H <sub>26</sub> O <sub>8</sub> | 419.1697                                               | 0.6           | 401.1570[M+H-H <sub>2</sub> O] <sup>+</sup> ,<br>386.1314[M+H-H <sub>2</sub> O-CH <sub>3</sub> ] <sup>+</sup> ,<br>359.1480[M+H-H <sub>2</sub> O-C <sub>3</sub> H <sub>6</sub> ] <sup>+</sup> ,<br>355.1138[M+H-H <sub>2</sub> O-CH <sub>3</sub> -OCH <sub>3</sub> ] <sup>+</sup> ,<br>331.1166[M+H-H <sub>2</sub> O-C <sub>3</sub> H <sub>6</sub> -CO] <sup>+</sup> ,<br>316.0931[M+H-H <sub>2</sub> O-C <sub>3</sub> H <sub>6</sub> -CO-CH <sub>3</sub> ] <sup>+</sup> ,<br>303.0851[M+H-H <sub>2</sub> O-C <sub>3</sub> H <sub>6</sub> -CO-C <sub>2</sub> H <sub>4</sub> ] <sup>+</sup> | Schisandrin A<br>loss of<br>2CH <sub>2</sub> +demmet<br>hylation to<br>carboxylic acid | P, F   |
| M3                                 | 5.57                    | C <sub>23</sub> H <sub>30</sub> O <sub>8</sub> | 435.2017                                               | -0.46         | 417.1994[M+H-H <sub>2</sub> O] <sup>+</sup> ,<br>399.1784[M+H-2H <sub>2</sub> O] <sup>+</sup> ,<br>386.1680[M+H-H <sub>2</sub> O-OCH <sub>3</sub> ] <sup>+</sup> ,<br>355.1805[M+H-H <sub>2</sub> O-2OCH <sub>3</sub> ] <sup>+</sup> ,<br>327.1198[M+H-H <sub>2</sub> O-2OCH <sub>3</sub> -C <sub>2</sub> H <sub>4</sub> ] <sup>+</sup>                                                                                                                                                                                                                                                    | Schisandrin A<br>loss of CH <sub>2</sub> +di-<br>oxidation                             | P      |
| M4                                 | 5.73                    | C <sub>23</sub> H <sub>28</sub> O <sub>7</sub> | 417.1912                                               | -0.72         | 399.1909[M+H-H <sub>2</sub> O] <sup>+</sup> ,<br>386.1819[M+H-OCH <sub>3</sub> ] <sup>+</sup> ,<br>368.1697[M+H-H <sub>2</sub> O-OCH <sub>3</sub> ] <sup>+</sup> ,<br>359.1581[M+H-H <sub>2</sub> O-C <sub>2</sub> H <sub>4</sub> O] <sup>+</sup> ,<br>344.1361[M+H-H <sub>2</sub> O-C <sub>2</sub> H <sub>4</sub> O-CH <sub>3</sub> ] <sup>+</sup> ,<br>328.1391[M+H-H <sub>2</sub> O-C <sub>2</sub> H <sub>4</sub> O-OCH <sub>3</sub> ] <sup>+</sup>                                                                                                                                     | Schisandrin B<br>oxidation                                                             | P, U   |
| M5                                 | 5.76                    | C <sub>23</sub> H <sub>30</sub> O <sub>8</sub> | 435.2016                                               | -0.69         | 417.1948[M+H-H <sub>2</sub> O] <sup>+</sup> ,<br>399.1678[M+H-2H <sub>2</sub> O] <sup>+</sup> ,<br>386.1643[M+H-H <sub>2</sub> O-OCH <sub>3</sub> ] <sup>+</sup> ,<br>355.1133[M+H-H <sub>2</sub> O-2OCH <sub>3</sub> ] <sup>+</sup> ,<br>327.1200[M+H-H <sub>2</sub> O-2OCH <sub>3</sub> -C <sub>2</sub> H <sub>4</sub> ] <sup>+</sup>                                                                                                                                                                                                                                                    | Schisandrin A<br>loss of CH <sub>2</sub> +di-<br>oxidation                             | P      |
| M6                                 | 6.12                    | C <sub>22</sub> H <sub>26</sub> O <sub>8</sub> | 419.1706                                               | 0             | 401.1556[M+H-H <sub>2</sub> O] <sup>+</sup> ,<br>388.1477[M+H-OCH <sub>3</sub> ] <sup>+</sup> ,<br>345.1413[M+H-H <sub>2</sub> O-C <sub>4</sub> H <sub>8</sub> ] <sup>+</sup> ,<br>327.1321[M+H-2H <sub>2</sub> O-C <sub>4</sub> H <sub>8</sub> ] <sup>+</sup> ,<br>296.1146[M+H-2H <sub>2</sub> O-C <sub>4</sub> H <sub>8</sub> -OCH <sub>3</sub> ] <sup>+</sup> ,<br>281.0930[M+H-2H <sub>2</sub> O-C <sub>4</sub> H <sub>8</sub> -OCH <sub>3</sub> -<br>CH <sub>3</sub> ] <sup>+</sup>                                                                                                  | Schisandrin B<br>loss of CH <sub>2</sub> +di-<br>oxidation                             | P, U   |
| M7                                 | 6.15                    | C <sub>22</sub> H <sub>26</sub> O <sub>8</sub> | 419.1697                                               | 0.6           | 401.1572[M+H-H <sub>2</sub> O] <sup>+</sup>                                                                                                                                                                                                                                                                                                                                                                                                                                                                                                                                                | Schisandrin A                                                                          | P, F   |

|     |      |                                                |          |       |                                                                                                                                                                                                                                                                                                                                                                                                                                                                                                                     |                                                                       |      |
|-----|------|------------------------------------------------|----------|-------|---------------------------------------------------------------------------------------------------------------------------------------------------------------------------------------------------------------------------------------------------------------------------------------------------------------------------------------------------------------------------------------------------------------------------------------------------------------------------------------------------------------------|-----------------------------------------------------------------------|------|
|     |      |                                                |          |       | 386.1462[M+H-H <sub>2</sub> O-CH <sub>3</sub> ] <sup>+</sup> ,<br>359.1480[M+H-H <sub>2</sub> O-C <sub>3</sub> H <sub>6</sub> ] <sup>+</sup> ,<br>355.1262[M+H-H <sub>2</sub> O-CH <sub>3</sub> -OCH <sub>3</sub> ] <sup>+</sup> ,<br>331.1167[M+H-H <sub>2</sub> O-C <sub>3</sub> H <sub>6</sub> -C <sub>2</sub> H <sub>4</sub> ] <sup>+</sup> ,<br>316.0944[M+H-H <sub>2</sub> O-C <sub>3</sub> H <sub>6</sub> -C <sub>2</sub> H <sub>4</sub> -<br>CH <sub>3</sub> ] <sup>+</sup>                                 | loss of<br>2CH <sub>2</sub> +demmet<br>hylation to<br>carboxylic acid |      |
| M8  | 6.17 | C <sub>23</sub> H <sub>28</sub> O <sub>7</sub> | 417.1915 | 0.48  | 399.1909[M+H-H <sub>2</sub> O] <sup>+</sup> ,<br>386.1746[M+H-OCH <sub>3</sub> ] <sup>+</sup> ,<br>368.1697[M+H-H <sub>2</sub> O-OCH <sub>3</sub> ] <sup>+</sup> ,<br>344.1361[M+H-H <sub>2</sub> O-OCH <sub>3</sub> -C <sub>3</sub> H <sub>6</sub> ] <sup>+</sup>                                                                                                                                                                                                                                                  | Schisandrin B<br>oxidation                                            | P, F |
| M9  | 6.19 | C <sub>23</sub> H <sub>30</sub> O <sub>8</sub> | 435.2017 | -0.46 | 417.1915[M+H-H <sub>2</sub> O] <sup>+</sup> ,<br>402.1791[M+H-H <sub>2</sub> O-CH <sub>3</sub> ] <sup>+</sup> ,<br>399.1848[M+H-2H <sub>2</sub> O] <sup>+</sup> ,<br>386.1784[M+H-H <sub>2</sub> O-OCH <sub>3</sub> ] <sup>+</sup> ,<br>368.1632[M+H-2H <sub>2</sub> O-OCH <sub>3</sub> ] <sup>+</sup> ,<br>344.1346[M+H-H <sub>2</sub> O-OCH <sub>3</sub> -C <sub>3</sub> H <sub>6</sub> ] <sup>+</sup>                                                                                                            | Schisandrin A<br>loss of CH <sub>2</sub> +di-<br>oxidation            | P, U |
| M10 | 6.32 | C <sub>23</sub> H <sub>28</sub> O <sub>7</sub> | 417.1911 | -0.48 | 399.1923[M+H-H <sub>2</sub> O] <sup>+</sup> ,<br>386.1743[M+H-OCH <sub>3</sub> ] <sup>+</sup> ,<br>368.1690[M+H-H <sub>2</sub> O-OCH <sub>3</sub> ] <sup>+</sup> ,<br>344.1318[M+H-H <sub>2</sub> O-OCH <sub>3</sub> -C <sub>3</sub> H <sub>6</sub> ] <sup>+</sup>                                                                                                                                                                                                                                                  | Schisandrin B<br>oxidation                                            | P, U |
| M11 | 6.45 | C <sub>23</sub> H <sub>28</sub> O <sub>8</sub> | 433.1863 | 0.23  | 415.1829[M+H-H <sub>2</sub> O] <sup>+</sup> ,<br>387.1893[M+H-HCOOH] <sup>+</sup> ,<br>384.1637[M+H-H <sub>2</sub> O-OCH <sub>3</sub> ] <sup>+</sup> ,<br>369.1428[M+H-H <sub>2</sub> O-OCH <sub>3</sub> -CH <sub>3</sub> ] <sup>+</sup> ,<br>345.1425[M+H-H <sub>2</sub> O-CO-C <sub>3</sub> H <sub>6</sub> ] <sup>+</sup> ,<br>330.1213[M+H-H <sub>2</sub> O-CO-C <sub>3</sub> H <sub>6</sub> -CH <sub>3</sub> ] <sup>+</sup> ,<br>317.1127[M+H-H <sub>2</sub> O-CO-C <sub>3</sub> H <sub>6</sub> -] <sup>+</sup> | Schisandrin A<br>ethyl to<br>carboxylic acid                          | P, U |
| M12 | 6.50 | C <sub>23</sub> H <sub>28</sub> O <sub>7</sub> | 417.1909 | -0.96 | 399.1919[M+H-H <sub>2</sub> O] <sup>+</sup> ,<br>386.1529[M+H-OCH <sub>3</sub> ] <sup>+</sup> ,<br>368.1657[M+H-H <sub>2</sub> O-OCH <sub>3</sub> ] <sup>+</sup> ,<br>359.1538[M+H-H <sub>2</sub> O-C <sub>2</sub> H <sub>4</sub> O] <sup>+</sup> ,<br>344.1331[M+H-H <sub>2</sub> O-C <sub>2</sub> H <sub>4</sub> O-CH <sub>3</sub> ] <sup>+</sup> ,<br>328.1385[M+H-H <sub>2</sub> O-C <sub>2</sub> H <sub>4</sub> O-OCH <sub>3</sub> ] <sup>+</sup>                                                              | Schisandrin B<br>oxidation                                            | P, U |
| M13 | 7.36 | C <sub>23</sub> H <sub>28</sub> O <sub>6</sub> | 401.1963 | -0.25 | 386.1890[M+H-CH <sub>3</sub> ] <sup>+</sup> ,<br>371.1744[M+H-2CH <sub>3</sub> ] <sup>+</sup> ,<br>355.1496[M+H-CH <sub>3</sub> -OCH <sub>3</sub> ] <sup>+</sup> ,<br>337.1421[M+H-CH <sub>3</sub> -OCH <sub>3</sub> -H <sub>2</sub> O] <sup>+</sup>                                                                                                                                                                                                                                                                | Schisandrin A<br>loss of<br>OCH <sub>2</sub> +carbony<br>l formation  | P    |
| M14 | 7.61 | C <sub>24</sub> H <sub>30</sub> O <sub>8</sub> | 447.2023 | 0.89  | 429.2250[M+H-H <sub>2</sub> O] <sup>+</sup> ,<br>401.1819[M+H-H <sub>2</sub> O-CO] <sup>+</sup> ,<br>386.1743[M+H-H <sub>2</sub> O-CO-CH <sub>3</sub> ] <sup>+</sup> ,<br>370.1819[M+H-H <sub>2</sub> O-CO-OCH <sub>3</sub> ] <sup>+</sup> ,<br>356.1636[M+H-H <sub>2</sub> O-CO-CH <sub>3</sub> -OCH <sub>3</sub> ] <sup>+</sup>                                                                                                                                                                                   | Schisandrin A<br>demethylation<br>to carboxylic<br>acid               | P    |
| M15 | 7.66 | C <sub>23</sub> H <sub>28</sub> O <sub>6</sub> | 401.1964 | 0     | 386.1891[M+H-CH <sub>3</sub> ] <sup>+</sup> ,<br>371.1732[M+H-2CH <sub>3</sub> ] <sup>+</sup>                                                                                                                                                                                                                                                                                                                                                                                                                       | Schisandrin A<br>loss of                                              | P    |

|     |      |                                                |          |       |                                                                                                                                                                                                                                                                                                                                                                                                                                                                                                                |                                                                                                   |      |
|-----|------|------------------------------------------------|----------|-------|----------------------------------------------------------------------------------------------------------------------------------------------------------------------------------------------------------------------------------------------------------------------------------------------------------------------------------------------------------------------------------------------------------------------------------------------------------------------------------------------------------------|---------------------------------------------------------------------------------------------------|------|
| M16 | 7.66 | C <sub>23</sub> H <sub>30</sub> O <sub>7</sub> | 419.2071 | 0.24  | 355.1538[M+H-CH <sub>3</sub> -OCH <sub>3</sub> ] <sup>+</sup> ,<br>337.1420[M+H-CH <sub>3</sub> -OCH <sub>3</sub> -H <sub>2</sub> O] <sup>+</sup><br>401.1932[M+H-H <sub>2</sub> O] <sup>+</sup> ,<br>386.1755[M+H-H <sub>2</sub> O-CH <sub>3</sub> ] <sup>+</sup> ,<br>370.1745[M+H-H <sub>2</sub> O-OCH <sub>3</sub> ] <sup>+</sup> ,<br>355.1537[M+H-H <sub>2</sub> O-OCH <sub>3</sub> -CH <sub>3</sub> ] <sup>+</sup> ,<br>337.1396[M+H-2H <sub>2</sub> O-OCH <sub>3</sub> -CH <sub>3</sub> ] <sup>+</sup> | OCH <sub>2</sub> +carbonyl<br>formation<br>Schisandrin A<br>loss of<br>CH <sub>2</sub> +oxidation | P    |
| M17 | 7.77 | C <sub>24</sub> H <sub>30</sub> O <sub>7</sub> | 431.2064 | -0.04 | 413.1981[M+H-H <sub>2</sub> O] <sup>+</sup> ,<br>400.1685[M+H-OCH <sub>3</sub> ] <sup>+</sup> ,<br>382.1745[M+H-H <sub>2</sub> O-OCH <sub>3</sub> ] <sup>+</sup> ,<br>373.1604[M+H-OCOCH <sub>2</sub> ] <sup>+</sup> ,<br>358.1413[M+H-OCOCH <sub>2</sub> -CH <sub>3</sub> ] <sup>+</sup> ,<br>342.1423[M+H-OCOCH <sub>2</sub> -OCH <sub>3</sub> ] <sup>+</sup> ,<br>327.1211[M+H-OCOCH <sub>2</sub> -OCH <sub>3</sub> -<br>CH <sub>3</sub> ] <sup>+</sup>                                                     | Schisandrin A<br>loss of<br>2CH <sub>2</sub> +acetylation                                         | P, U |
| M18 | 7.82 | C <sub>23</sub> H <sub>28</sub> O <sub>6</sub> | 401.1961 | -0.75 | 386.1712[M+H-CH <sub>3</sub> ] <sup>+</sup> ,<br>370.1862[M+H-OCH <sub>3</sub> ] <sup>+</sup> ,<br>355.1657[M+H-CH <sub>3</sub> -OCH <sub>3</sub> ] <sup>+</sup> ,<br>337.1533[M+H-CH <sub>3</sub> -OCH <sub>3</sub> -H <sub>2</sub> O] <sup>+</sup>                                                                                                                                                                                                                                                           | Schisandrin A<br>loss of<br>OCH <sub>2</sub> +carbonyl<br>formation                               | P    |
| M19 | 7.84 | C <sub>23</sub> H <sub>30</sub> O <sub>7</sub> | 419.2070 | 0     | 401.1930[M+H-H <sub>2</sub> O] <sup>+</sup> ,<br>386.1700[M+H-H <sub>2</sub> O-CH <sub>3</sub> ] <sup>+</sup> ,<br>370.1745[M+H-H <sub>2</sub> O-OCH <sub>3</sub> ] <sup>+</sup> ,<br>355.1527[M+H-H <sub>2</sub> O-OCH <sub>3</sub> -CH <sub>3</sub> ] <sup>+</sup> ,<br>337.1390[M+H-2H <sub>2</sub> O-OCH <sub>3</sub> -CH <sub>3</sub> ] <sup>+</sup>                                                                                                                                                      | Schisandrin A<br>loss of<br>CH <sub>2</sub> +oxidation                                            | P    |
| M20 | 7.97 | C <sub>23</sub> H <sub>28</sub> O <sub>6</sub> | 401.1960 | -0.98 | 386.1770[M+H-CH <sub>3</sub> ] <sup>+</sup> ,<br>371.1848[M+H-2CH <sub>3</sub> ] <sup>+</sup> ,<br>355.1563[M+H-CH <sub>3</sub> -OCH <sub>3</sub> ] <sup>+</sup> ,<br>337.1556[M+H-CH <sub>3</sub> -OCH <sub>3</sub> -H <sub>2</sub> O] <sup>+</sup>                                                                                                                                                                                                                                                           | Schisandrin A<br>loss of<br>OCH <sub>2</sub> +carbonyl<br>formation                               | P    |
| M21 | 7.99 | C <sub>23</sub> H <sub>30</sub> O <sub>7</sub> | 419.2070 | 0     | 401.1930[M+H-H <sub>2</sub> O] <sup>+</sup> ,<br>386.1755[M+H-H <sub>2</sub> O-CH <sub>3</sub> ] <sup>+</sup> ,<br>370.1776[M+H-H <sub>2</sub> O-OCH <sub>3</sub> ] <sup>+</sup> ,<br>355.1572[M+H-CH <sub>3</sub> -H <sub>2</sub> O-OCH <sub>3</sub> ] <sup>+</sup> ,<br>337.1426[M+H-2H <sub>2</sub> O-OCH <sub>3</sub> -CH <sub>3</sub> ] <sup>+</sup>                                                                                                                                                      | Schisandrin A<br>loss of<br>CH <sub>2</sub> +oxidation                                            | P    |
| M22 | 8.11 | C <sub>23</sub> H <sub>28</sub> O <sub>6</sub> | 401.1963 | -0.25 | 386.1710[M+H-CH <sub>3</sub> ] <sup>+</sup> ,<br>370.1749[M+H-OCH <sub>3</sub> ] <sup>+</sup> ,<br>355.1544[M+H-CH <sub>3</sub> -OCH <sub>3</sub> ] <sup>+</sup> ,<br>337.1534[M+H-CH <sub>3</sub> -OCH <sub>3</sub> -H <sub>2</sub> O] <sup>+</sup> ,<br>332.1256[M+H-CH <sub>3</sub> -C <sub>4</sub> H <sub>6</sub> ] <sup>+</sup>                                                                                                                                                                           | Schisandrin A<br>loss of<br>OCH <sub>2</sub> +ketone<br>formation                                 | P    |
| M23 | 8.24 | C <sub>23</sub> H <sub>28</sub> O <sub>6</sub> | 401.1960 | -0.98 | 386.1687[M+H-CH <sub>3</sub> ] <sup>+</sup> ,<br>370.1743[M+H-OCH <sub>3</sub> ] <sup>+</sup> ,<br>355.1511[M+H-CH <sub>3</sub> -OCH <sub>3</sub> ] <sup>+</sup> ,<br>337.1530[M+H-CH <sub>3</sub> -OCH <sub>3</sub> -H <sub>2</sub> O] <sup>+</sup> ,<br>332.1250[M+H-CH <sub>3</sub> -C <sub>4</sub> H <sub>6</sub> ] <sup>+</sup>                                                                                                                                                                           | Schisandrin A<br>loss of<br>OCH <sub>2</sub> +ketone<br>formation                                 | P    |
| M24 | 8.28 | C <sub>23</sub> H <sub>26</sub> O <sub>7</sub> | 415.1755 | -0.48 | 397.1583[M+H-H <sub>2</sub> O] <sup>+</sup>                                                                                                                                                                                                                                                                                                                                                                                                                                                                    | Schisandrin B                                                                                     | P    |

|     |       |                                                |          |       |                                                                                                                                                                                                                                                                                                                                                                                                                                                                                                                                                                                                                                                                                                                                                                                    |                                                                                        |      |
|-----|-------|------------------------------------------------|----------|-------|------------------------------------------------------------------------------------------------------------------------------------------------------------------------------------------------------------------------------------------------------------------------------------------------------------------------------------------------------------------------------------------------------------------------------------------------------------------------------------------------------------------------------------------------------------------------------------------------------------------------------------------------------------------------------------------------------------------------------------------------------------------------------------|----------------------------------------------------------------------------------------|------|
|     |       |                                                |          |       | 385.1667[M+H-OCH <sub>2</sub> ] <sup>+</sup> ,<br>373.1772[M+H-C <sub>3</sub> H <sub>6</sub> ] <sup>+</sup> ,<br>366.1451[M+H-H <sub>2</sub> O-OCH <sub>3</sub> ] <sup>+</sup> ,<br>342.1080[M+H-C <sub>3</sub> H <sub>6</sub> -OCH <sub>3</sub> ] <sup>+</sup> ,<br>327.1198[M+H-C <sub>3</sub> H <sub>6</sub> -OCH <sub>3</sub> -CH <sub>3</sub> ] <sup>+</sup>                                                                                                                                                                                                                                                                                                                                                                                                                  | methylene to<br>Ketone                                                                 |      |
| M25 | 8.41  | C <sub>23</sub> H <sub>28</sub> O <sub>6</sub> | 401.1970 | 0.75  | 386.1680[M+H-CH <sub>3</sub> ] <sup>+</sup> ,<br>370.1733[M+H-OCH <sub>3</sub> ] <sup>+</sup> ,<br>355.1510[M+H-CH <sub>3</sub> -OCH <sub>3</sub> ] <sup>+</sup> ,<br>337.1533[M+H-CH <sub>3</sub> -OCH <sub>3</sub> -H <sub>2</sub> O] <sup>+</sup> ,<br>332.1253[M+H-CH <sub>3</sub> -C <sub>4</sub> H <sub>6</sub> ] <sup>+</sup>                                                                                                                                                                                                                                                                                                                                                                                                                                               | Schisandrin A<br>loss of<br>OCH <sub>2</sub> +bis-<br>ketone<br>formation              | P    |
| M26 | 8.51  | C <sub>23</sub> H <sub>26</sub> O <sub>7</sub> | 415.1755 | -0.48 | 397.1576[M+H-H <sub>2</sub> O] <sup>+</sup> ,<br>385.1660[M+H-OCH <sub>2</sub> ] <sup>+</sup> ,<br>373.1771[M+H-C <sub>3</sub> H <sub>6</sub> ] <sup>+</sup> ,<br>366.1455[M+H-H <sub>2</sub> O-OCH <sub>3</sub> ] <sup>+</sup> ,<br>342.1090[M+H-C <sub>3</sub> H <sub>6</sub> -OCH <sub>3</sub> ] <sup>+</sup> ,<br>327.1148[M+H-C <sub>3</sub> H <sub>6</sub> -OCH <sub>3</sub> -CH <sub>3</sub> ] <sup>+</sup>                                                                                                                                                                                                                                                                                                                                                                 | Schisandrin B<br>methylene to<br>Ketone                                                | P    |
| M27 | 9.39  | C <sub>24</sub> H <sub>30</sub> O <sub>6</sub> | 415.2121 | 0     | 400.1875[M+H-CH <sub>3</sub> ] <sup>+</sup> ,<br>384.1934[M+H-OCH <sub>3</sub> ] <sup>+</sup> ,<br>369.1693[M+H-OCH <sub>3</sub> -CH <sub>3</sub> ] <sup>+</sup> ,<br>353.1727[M+H-2OCH <sub>3</sub> ] <sup>+</sup> ,<br>342.1461[M+H-COOCH <sub>2</sub> ] <sup>+</sup> ,<br>338.1505[M+H-2OCH <sub>3</sub> -CH <sub>3</sub> ] <sup>+</sup>                                                                                                                                                                                                                                                                                                                                                                                                                                        | Schisandrin A<br>loss of OCH <sub>2</sub><br>and<br>CH <sub>2</sub> +acetylation       | P, U |
| M28 | 9.60  | C <sub>22</sub> H <sub>26</sub> O <sub>6</sub> | 387.1806 | -0.52 | 372.1775[M+H-CH <sub>3</sub> ] <sup>+</sup> ,<br>356.1666[M+H-OCH <sub>3</sub> ] <sup>+</sup> ,<br>341.1418[M+H-OCH <sub>3</sub> -CH <sub>3</sub> ] <sup>+</sup> ,<br>323.1406[M+H-OCH <sub>3</sub> -CH <sub>3</sub> -H <sub>2</sub> O] <sup>+</sup> ,<br>295.1440[M+H-OCH <sub>3</sub> -CH <sub>3</sub> -H <sub>2</sub> O-CO] <sup>+</sup>                                                                                                                                                                                                                                                                                                                                                                                                                                        | Schisandrin A<br>loss of<br>2OCH <sub>2</sub> +demet<br>hylation to<br>carboxylic acid | P, F |
| M29 | 9.68  | C <sub>27</sub> H <sub>32</sub> O <sub>8</sub> | 485.2172 | -0.54 | 454.1706[M+H-OCH <sub>3</sub> ] <sup>+</sup> ,<br>426.1600[M+H-OCH <sub>3</sub> -C <sub>2</sub> H <sub>4</sub> ] <sup>+</sup> ,<br>401.1560[M+H-C <sub>6</sub> H <sub>12</sub> ] <sup>+</sup> ,<br>383.1464[M+H-C <sub>6</sub> H <sub>12</sub> -H <sub>2</sub> O] <sup>+</sup> ,<br>371.1483[M+H-C <sub>6</sub> H <sub>12</sub> -OCH <sub>2</sub> ] <sup>+</sup> ,<br>352.1295[M+H-C <sub>6</sub> H <sub>12</sub> -H <sub>2</sub> O-OCH <sub>3</sub> ] <sup>+</sup> ,<br>341.1015[M+H-C <sub>6</sub> H <sub>12</sub> -2OCH <sub>2</sub> ] <sup>+</sup> ,<br>337.1067[M+H-C <sub>6</sub> H <sub>12</sub> -H <sub>2</sub> O-OCH <sub>3</sub> -<br>CH <sub>3</sub> ] <sup>+</sup> ,<br>326.1128[M+H-C <sub>6</sub> H <sub>12</sub> -2OCH <sub>2</sub> -CH <sub>3</sub> ] <sup>+</sup> | Schisantherin B<br>-OCH <sub>2</sub>                                                   | P, U |
| M30 | 10.13 | C <sub>22</sub> H <sub>28</sub> O <sub>6</sub> | 389.1961 | -0.77 | 374.1799[M+H-CH <sub>3</sub> ] <sup>+</sup> ,<br>358.1874[M+H-OCH <sub>3</sub> ] <sup>+</sup> ,<br>343.1460[M+H-OCH <sub>3</sub> -CH <sub>3</sub> ] <sup>+</sup> ,<br>319.2025[M+H-C <sub>5</sub> H <sub>10</sub> ] <sup>+</sup> ,<br>288.1084[M+H-C <sub>5</sub> H <sub>10</sub> -OCH <sub>3</sub> ] <sup>+</sup> ,<br>273.0863[M+H-C <sub>5</sub> H <sub>10</sub> -OCH <sub>3</sub> -CH <sub>3</sub> ] <sup>+</sup>                                                                                                                                                                                                                                                                                                                                                              | Schisandrin A<br>loss of 2CH <sub>2</sub>                                              | P, F |
| M31 | 10.23 | C <sub>24</sub> H <sub>30</sub> O <sub>6</sub> | 415.2117 | -0.69 | 400.1865[M+H-CH <sub>3</sub> ] <sup>+</sup>                                                                                                                                                                                                                                                                                                                                                                                                                                                                                                                                                                                                                                                                                                                                        | Schisandrin A                                                                          | P, U |

|                                      |       |                                                |          |       |                                                                                                                                                                                                                                                                                                                                                                                                                                                            |                                                                           |      |  |
|--------------------------------------|-------|------------------------------------------------|----------|-------|------------------------------------------------------------------------------------------------------------------------------------------------------------------------------------------------------------------------------------------------------------------------------------------------------------------------------------------------------------------------------------------------------------------------------------------------------------|---------------------------------------------------------------------------|------|--|
|                                      |       |                                                |          |       | 384.1924[M+H-OCH <sub>3</sub> ] <sup>+</sup> ,<br>369.1690[M+H-OCH <sub>3</sub> -CH <sub>3</sub> ] <sup>+</sup> ,<br>353.1737[M+H-2OCH <sub>3</sub> ] <sup>+</sup> ,<br>342.1456 [M+H-COOCH <sub>2</sub> ] <sup>+</sup> ,<br>338.1500[M+H-2OCH <sub>3</sub> -CH <sub>3</sub> ] <sup>+</sup>                                                                                                                                                                | loss of OCH <sub>2</sub><br>and<br>CH <sub>2</sub> +acetylation           |      |  |
| M32                                  | 10.80 | C <sub>23</sub> H <sub>28</sub> O <sub>6</sub> | 401.1967 | 0.75  | 386.1713[M+H-CH <sub>3</sub> ] <sup>+</sup> ,<br>370.1866[M+H-OCH <sub>3</sub> ] <sup>+</sup> ,<br>355.1648[M+H-CH <sub>3</sub> -OCH <sub>3</sub> ] <sup>+</sup> ,<br>337.1537[M+H-CH <sub>3</sub> -OCH <sub>3</sub> -H <sub>2</sub> O] <sup>+</sup> ,<br>332.1254[M+H-CH <sub>3</sub> -C <sub>4</sub> H <sub>6</sub> ] <sup>+</sup>                                                                                                                       | Schisandrin A<br>loss of<br>OCH <sub>2</sub> +ketone<br>formation         | P, U |  |
| M33                                  | 11.43 | C <sub>24</sub> H <sub>30</sub> O <sub>7</sub> | 431.2067 | -0.71 | 413.2003[M+H-H <sub>2</sub> O] <sup>+</sup> ,<br>400.1863[M+H-OCH <sub>3</sub> ] <sup>+</sup> ,<br>382.1785[M+H-H <sub>2</sub> O-OCH <sub>3</sub> ] <sup>+</sup> ,<br>373.1614[M+H-OCOCH <sub>2</sub> ] <sup>+</sup> ,<br>358.1437[M+H-OCOCH <sub>2</sub> -CH <sub>3</sub> ] <sup>+</sup> ,<br>342.1442[M+H-OCOCH <sub>2</sub> -OCH <sub>3</sub> ] <sup>+</sup> ,<br>327.1222[M+H-OCOCH <sub>2</sub> -OCH <sub>3</sub> -<br>CH <sub>3</sub> ] <sup>+</sup> | Schisandrin A<br>loss of<br>2CH <sub>2</sub> +acetylation                 | P    |  |
| M34                                  | 12.11 | C <sub>23</sub> H <sub>26</sub> O <sub>7</sub> | 415.1752 | -0.31 | 400.1735[M+H-CH <sub>3</sub> ] <sup>+</sup> ,<br>385.1607[M+H-OCH <sub>2</sub> ] <sup>+</sup> ,<br>371.1476[M+H-C <sub>3</sub> H <sub>6</sub> ] <sup>+</sup> ,<br>356.1259[M+H-C <sub>3</sub> H <sub>6</sub> -CH <sub>3</sub> ] <sup>+</sup> ,<br>340.1301[M+H-C <sub>3</sub> H <sub>6</sub> -OCH <sub>3</sub> ] <sup>+</sup> ,<br>325.1073[M+H-C <sub>3</sub> H <sub>6</sub> -OCH <sub>3</sub> -CH <sub>3</sub> ] <sup>+</sup>                            | Schisandrin A<br>loss of<br>OCH <sub>2</sub> +bis-<br>ketone<br>formation | P, U |  |
| M35                                  | 12.37 | C <sub>23</sub> H <sub>26</sub> O <sub>7</sub> | 415.1755 | -0.48 | 385.1759[M+H-OCH <sub>2</sub> ] <sup>+</sup> ,<br>371.1600[M+H-C <sub>3</sub> H <sub>6</sub> ] <sup>+</sup> ,<br>356.1359[M+H-C <sub>3</sub> H <sub>6</sub> -CH <sub>3</sub> ] <sup>+</sup> ,<br>340.1410[M+H-C <sub>3</sub> H <sub>6</sub> -OCH <sub>3</sub> ] <sup>+</sup> ,<br>325.1177[M+H-C <sub>3</sub> H <sub>6</sub> -OCH <sub>3</sub> -CH <sub>3</sub> ] <sup>+</sup>                                                                             | Schisandrin A<br>loss of<br>OCH <sub>2</sub> +bis-<br>ketone<br>formation | P, U |  |
| M36                                  | 12.50 | C <sub>23</sub> H <sub>26</sub> O <sub>7</sub> | 415.1755 | -0.77 | 400.1765[M+H-CH <sub>3</sub> ] <sup>+</sup> ,<br>385.1632[M+H-OCH <sub>2</sub> ] <sup>+</sup> ,<br>371.1480[M+H-C <sub>3</sub> H <sub>6</sub> ] <sup>+</sup> ,<br>356.1259[M+H-C <sub>3</sub> H <sub>6</sub> -CH <sub>3</sub> ] <sup>+</sup> ,<br>340.1306[M+H-C <sub>3</sub> H <sub>6</sub> -OCH <sub>3</sub> ] <sup>+</sup> ,<br>325.1066[M+H-C <sub>3</sub> H <sub>6</sub> -OCH <sub>3</sub> -CH <sub>3</sub> ] <sup>+</sup>                            | Schisandrin A<br>loss of<br>OCH <sub>2</sub> +bis-<br>ketone<br>formation | P, U |  |
| M37                                  | 12.94 | C <sub>23</sub> H <sub>30</sub> O <sub>6</sub> | 403.2113 | 0.63  | 388.1873[M+H-CH <sub>3</sub> ] <sup>+</sup> ,<br>372.1923[M+H-OCH <sub>3</sub> ] <sup>+</sup> ,<br>357.1673[M+H-CH <sub>3</sub> -OCH <sub>3</sub> ] <sup>+</sup> ,<br>302.1137[M+H-OCH <sub>3</sub> -C <sub>5</sub> H <sub>10</sub> ] <sup>+</sup> ,<br>287.0890[M+H-OCH <sub>3</sub> -C <sub>5</sub> H <sub>10</sub> -CH <sub>3</sub> ] <sup>+</sup> ,<br>271.0953[M+H-2OCH <sub>3</sub> -C <sub>5</sub> H <sub>10</sub> ] <sup>+</sup>                   | Schisandrin A<br>loss of CH <sub>2</sub>                                  | P    |  |
| <i>Tashinone-related metabolites</i> |       |                                                |          |       |                                                                                                                                                                                                                                                                                                                                                                                                                                                            |                                                                           |      |  |
| M38                                  | 6.34  | C <sub>19</sub> H <sub>20</sub> O <sub>6</sub> | 345.1335 | -0.87 | 327.1267[M+H-H <sub>2</sub> O] <sup>+</sup> ,<br>309.1068[M+H-2H <sub>2</sub> O] <sup>+</sup>                                                                                                                                                                                                                                                                                                                                                              | Tri-<br>hydroxylation                                                     | P, F |  |



|     |      |                                                |          |       |                                                                                                                                                                                                                                                                                    |                                              |      |
|-----|------|------------------------------------------------|----------|-------|------------------------------------------------------------------------------------------------------------------------------------------------------------------------------------------------------------------------------------------------------------------------------------|----------------------------------------------|------|
|     |      |                                                |          |       | 299.1256[M+H-H <sub>2</sub> O-CO] <sup>+</sup> ,<br>281.1166[M+H-2H <sub>2</sub> O-CO] <sup>+</sup> ,<br>263.1067[M+H-3H <sub>2</sub> O-CO] <sup>+</sup> ,<br>235.1113[M+H-3H <sub>2</sub> O-2CO] <sup>+</sup>                                                                     | cryptotanshino<br>ne                         |      |
| M39 | 6.43 | C <sub>18</sub> H <sub>12</sub> O <sub>4</sub> | 293.0816 | 0.68  | 278.1529[M+H-CH <sub>3</sub> ] <sup>+</sup> ,<br>265.1137[M+H-CO] <sup>+</sup> ,<br>234.0703[M+H-CO-CH <sub>2</sub> OH] <sup>+</sup> ,<br>219.0817[M+H-CO-CH <sub>2</sub> OH-CH <sub>3</sub> ] <sup>+</sup>                                                                        | Hydroxylation<br>tanshinone I                | P, F |
| M40 | 6.46 | C <sub>19</sub> H <sub>20</sub> O <sub>4</sub> | 313.1438 | -0.64 | 285.1472[M+H-CO] <sup>+</sup> ,<br>267.1397[M+H-CO-H <sub>2</sub> O] <sup>+</sup> ,<br>254.1301[M+H-CO-CH <sub>2</sub> OH] <sup>+</sup> ,<br>252.1150[M+H-CO-H <sub>2</sub> O-CH <sub>3</sub> ] <sup>+</sup>                                                                       | Hydroxylation<br>cryptotanshino<br>ne        | P, F |
| M41 | 6.55 | C <sub>19</sub> H <sub>20</sub> O <sub>4</sub> | 313.1437 | -0.96 | 285.1513[M+H-CO] <sup>+</sup> ,<br>267.1380[M+H-CO-H <sub>2</sub> O] <sup>+</sup> ,<br>254.1293[M+H-CO-CH <sub>2</sub> OH] <sup>+</sup> ,<br>252.1143[M+H-CO-H <sub>2</sub> O-CH <sub>3</sub> ] <sup>+</sup>                                                                       | Hydroxylation<br>cryptotanshino<br>ne        | P, F |
| M42 | 6.63 | C <sub>19</sub> H <sub>20</sub> O <sub>4</sub> | 313.1438 | -0.64 | 285.1460[M+H-CO] <sup>+</sup> ,<br>267.1371[M+H-CO-H <sub>2</sub> O] <sup>+</sup> ,<br>254.1281[M+H-CO-CH <sub>2</sub> OH] <sup>+</sup> ,<br>252.1147[M+H-CO-H <sub>2</sub> O-CH <sub>3</sub> ] <sup>+</sup>                                                                       | Hydroxylation<br>cryptotanshino<br>ne        | P, F |
| M43 | 6.63 | C <sub>19</sub> H <sub>20</sub> O <sub>5</sub> | 329.1387 | -0.61 | 311.1268 [M+H-H <sub>2</sub> O] <sup>+</sup> ,<br>283.1328[M+H-H <sub>2</sub> O-CO] <sup>+</sup> ,<br>265.1239[M+H-2H <sub>2</sub> O-CO] <sup>+</sup> ,<br>250.0988[M+H-2H <sub>2</sub> O-CO-CH <sub>3</sub> ] <sup>+</sup> ,<br>237.1265 [M+H-2H <sub>2</sub> O-2CO] <sup>+</sup> | Di-<br>hydroxylation<br>cryptotanshino<br>ne | P, F |
| M44 | 7.18 | C <sub>19</sub> H <sub>18</sub> O <sub>5</sub> | 327.1232 | 0     | 309.1108[M+H-H <sub>2</sub> O] <sup>+</sup> ,<br>281.1167[M+H-H <sub>2</sub> O-CO] <sup>+</sup> ,<br>250.0978[M+H-H <sub>2</sub> O-CO-CH <sub>2</sub> OH] <sup>+</sup>                                                                                                             | Di-<br>hydroxylation<br>tanshinone IIA       | P, F |
| M45 | 7.39 | C <sub>18</sub> H <sub>12</sub> O <sub>4</sub> | 293.0807 | -0.34 | 278.0876[M+H-CH <sub>3</sub> ] <sup>+</sup> ,<br>265.0784[M+H-CO] <sup>+</sup> ,<br>234.0679[M+H-CO-CH <sub>2</sub> OH] <sup>+</sup> ,<br>219.0801[M+H-CO-CH <sub>2</sub> OH-CH <sub>3</sub> ] <sup>+</sup>                                                                        | Hydroxylation<br>tanshinone I                | P, F |
| M46 | 8.99 | C <sub>19</sub> H <sub>20</sub> O <sub>5</sub> | 329.1382 | -2.13 | 311.1270[M+H-H <sub>2</sub> O] <sup>+</sup> ,<br>283.1323[M+H-H <sub>2</sub> O-CO] <sup>+</sup> ,<br>265.1226[M+H-2H <sub>2</sub> O-CO] <sup>+</sup> ,<br>250.0989[M+H-2H <sub>2</sub> O-CO-CH <sub>3</sub> ] <sup>+</sup> ,<br>237.1245 [M+H-2H <sub>2</sub> O-2CO] <sup>+</sup>  | Di-<br>hydroxylation<br>cryptotanshino<br>ne | P, F |
| M47 | 9.34 | C <sub>19</sub> H <sub>20</sub> O <sub>5</sub> | 329.1383 | -2.13 | 311.1273[M+H-H <sub>2</sub> O] <sup>+</sup> ,<br>283.1320[M+H-H <sub>2</sub> O-CO] <sup>+</sup> ,<br>265.1229[M+H-2H <sub>2</sub> O-CO] <sup>+</sup> ,<br>250.0998[M+H-2H <sub>2</sub> O-CO-CH <sub>3</sub> ] <sup>+</sup> ,<br>237.1255 [M+H-2H <sub>2</sub> O-2CO] <sup>+</sup>  | Di-<br>hydroxylation<br>cryptotanshino<br>ne | P, F |
| M48 | 9.50 | C <sub>19</sub> H <sub>20</sub> O <sub>4</sub> | 313.1439 | -0.32 | 295.1437[M+H-H <sub>2</sub> O] <sup>+</sup> ,<br>277.1348[M+H-2H <sub>2</sub> O] <sup>+</sup>                                                                                                                                                                                      | Hydroxylation<br>cryptotanshino              | P, F |

|                                         |       |                                                 |                       |       |                                                                                                                                                                                                                                                                                                                                           |                                              |         |
|-----------------------------------------|-------|-------------------------------------------------|-----------------------|-------|-------------------------------------------------------------------------------------------------------------------------------------------------------------------------------------------------------------------------------------------------------------------------------------------------------------------------------------------|----------------------------------------------|---------|
|                                         |       |                                                 |                       |       | 262.1104[M+H-2H <sub>2</sub> O-CH <sub>3</sub> ] <sup>+</sup> ,<br>249.1400[M+H-2H <sub>2</sub> O-CO] <sup>+</sup>                                                                                                                                                                                                                        | ne                                           |         |
| M49                                     | 9.57  | C <sub>19</sub> H <sub>18</sub> O <sub>5</sub>  | 327.1231              | -0.31 | 309.1124[M+H-H <sub>2</sub> O] <sup>+</sup> ,<br>291.1021[M+H-2H <sub>2</sub> O] <sup>+</sup> ,<br>281.1178[M+H-H <sub>2</sub> O-CO] <sup>+</sup> ,<br>250.1091[M+H-H <sub>2</sub> O-CO-CH <sub>2</sub> OH] <sup>+</sup>                                                                                                                  | Hydroxyl<br>tashinone IIB                    | P, F    |
| M50                                     | 10.30 | C <sub>19</sub> H <sub>18</sub> O <sub>4</sub>  | 311.1281              | -0.64 | 283.1337[M+H-H <sub>2</sub> O] <sup>+</sup> ,<br>265.1218[M+H-2H <sub>2</sub> O] <sup>+</sup> ,<br>250.0992[M+H-2H <sub>2</sub> O-CH <sub>3</sub> ] <sup>+</sup> ,<br>237.1274[M+H-2H <sub>2</sub> O-CO] <sup>+</sup> ,<br>222.1018[M+H-2H <sub>2</sub> O-CO-CH <sub>3</sub> ] <sup>+</sup>                                               | Hydroxylation<br>tanshinone II A             | P, F    |
| M51                                     | 10.31 | C <sub>19</sub> H <sub>20</sub> O <sub>5</sub>  | 329.1384              | -2.13 | 311.1298[M+H-H <sub>2</sub> O] <sup>+</sup> ,<br>283.1324[M+H-H <sub>2</sub> O-CO] <sup>+</sup> ,<br>265.1219[M+H-2H <sub>2</sub> O-CO] <sup>+</sup> ,<br>250.0998[M+H-2H <sub>2</sub> O-CO-CH <sub>3</sub> ] <sup>+</sup> ,<br>237.1268[M+H-2H <sub>2</sub> O-2CO] <sup>+</sup>                                                          | Di-<br>hydroxylation<br>cryptotanshino<br>ne | P, F    |
| M52                                     | 12.99 | C <sub>19</sub> H <sub>16</sub> O <sub>3</sub>  | 293.1176              | -0.68 | 278.0967[M+H-CH <sub>3</sub> ] <sup>+</sup> ,<br>275.1138[M+H-H <sub>2</sub> O] <sup>+</sup> ,<br>263.0684[M+H-2CH <sub>3</sub> ] <sup>+</sup> ,<br>260.0858[M+H-CH <sub>3</sub> -H <sub>2</sub> O] <sup>+</sup> ,<br>247.1094[M+H-H <sub>2</sub> O-CO] <sup>+</sup> ,<br>232.0931[M+H-H <sub>2</sub> O-CO-CH <sub>3</sub> ] <sup>+</sup> | Dehydrogenati<br>on<br>tanshinone II A       | P, F    |
| <i>Ginsenosides-related metabolites</i> |       |                                                 |                       |       |                                                                                                                                                                                                                                                                                                                                           |                                              |         |
| M53                                     | 5.68  | C <sub>54</sub> H <sub>92</sub> O <sub>24</sub> | 1123.5893             | -0.62 | 961.5382[M-H-Glc] <sup>-</sup> ,<br>799.4846[M-H-2Glc] <sup>-</sup> ,<br>637.4310[M-H-3Glc] <sup>-</sup> ,<br>475.3780[M-H-4Glc] <sup>-</sup>                                                                                                                                                                                             | Monooxyg<br>enated Rb <sub>1</sub>           | P, U    |
| M54                                     | 7.58  | C <sub>36</sub> H <sub>62</sub> O <sub>9</sub>  | 683.4382 <sup>a</sup> | 1.76  | 475.3817[M-H-Glc] <sup>-</sup>                                                                                                                                                                                                                                                                                                            | F <sub>1</sub> /isomer                       | P       |
| M55                                     | 7.64  | C <sub>54</sub> H <sub>92</sub> O <sub>23</sub> | 1107.5951             | 0     | 945.5405[M-H-Glc] <sup>-</sup> ,<br>783.4812[M-H-2Glc] <sup>-</sup> ,<br>621.4267[M-H-3Glc] <sup>-</sup> ,<br>459.3849[M-H-4Glc] <sup>-</sup>                                                                                                                                                                                             | Ra <sub>3</sub> -Xyl                         | P, U, F |
| M56                                     | 9.13  | C <sub>48</sub> H <sub>82</sub> O <sub>18</sub> | 945.5438              | 1.59  | 783.4793 [M-H-Glc] <sup>-</sup> ,<br>621.4172[M-H-2Glc] <sup>-</sup> ,<br>459.3710[M-H-3Glc] <sup>-</sup>                                                                                                                                                                                                                                 | Rd isomer                                    | P, U, F |
| M57                                     | 9.25  | C <sub>48</sub> H <sub>82</sub> O <sub>18</sub> | 945.5433              | 1.06  | 783.4795 [M-H-Glc] <sup>-</sup> ,<br>621.4192[M-H-2Glc] <sup>-</sup> ,<br>459.3715[M-H-3Glc] <sup>-</sup>                                                                                                                                                                                                                                 | Rd isomer                                    | U, F    |
| M58                                     | 9.33  | C <sub>36</sub> H <sub>62</sub> O <sub>9</sub>  | 683.4386 <sup>a</sup> | 2.34  | 475.3681[M-H-Glc] <sup>-</sup>                                                                                                                                                                                                                                                                                                            | F <sub>1</sub> /isomer                       | P, U, F |
| M59                                     | 9.37  | C <sub>48</sub> H <sub>82</sub> O <sub>18</sub> | 991.5485 <sup>a</sup> | 0.71  | 783.4799[M-H-Glc] <sup>-</sup> ,<br>621.4285[M-H-2Glc] <sup>-</sup> ,<br>459.3772[M-H-3Glc] <sup>-</sup>                                                                                                                                                                                                                                  | Rd isomer                                    | U, F    |
| M60                                     | 9.88  | C <sub>42</sub> H <sub>66</sub> O <sub>14</sub> | 793.4381              | 0.88  | 613.3840[M-H-Glc] <sup>-</sup> ,<br>569.3850[M-H-Glc-CO <sub>2</sub> -H <sub>2</sub> O] <sup>-</sup>                                                                                                                                                                                                                                      | Ro-Glc                                       | P, U, F |

---

|     |       |                                                |          |      |                                                                     |                    |         |
|-----|-------|------------------------------------------------|----------|------|---------------------------------------------------------------------|--------------------|---------|
|     |       |                                                |          |      | 551.3734[M-H-Glc-CO <sub>2</sub> -2H <sub>2</sub> O] <sup>-</sup> , |                    |         |
|     |       |                                                |          |      | 455.3525[M-H-Glc-Glu A] <sup>-</sup>                                |                    |         |
| M61 | 10.82 | C <sub>36</sub> H <sub>56</sub> O <sub>9</sub> | 631.3850 | 0.63 | 455.3584[M-H-Glu A] <sup>-</sup>                                    | Ro-2Glc            | P, U, F |
| M62 | 11.81 | C <sub>36</sub> H <sub>56</sub> O <sub>9</sub> | 631.3862 | 2.53 | 455.3571[M-H-Glu A] <sup>-</sup>                                    | Ro isomer-<br>2Glc | U, F    |

---

*a*: Stands for [M+HCOO]<sup>-</sup>.

**Table S3** The relative content of each compound in plasma.

| No.                         | Compound Name                                                                           | Relative Content (%) | Total Content (%) |
|-----------------------------|-----------------------------------------------------------------------------------------|----------------------|-------------------|
| <b>In positive ion mode</b> |                                                                                         |                      |                   |
| <i>Lignans</i>              |                                                                                         |                      |                   |
| 1                           | Gomisin D isomer                                                                        | 0.003                | 58.868            |
| 2                           | Schizandrol A                                                                           | 3.606                |                   |
| 3                           | Gomisin D                                                                               | 2.064                |                   |
| 4                           | Schizandrol A isomer                                                                    | 0.079                |                   |
| 5                           | Gomisin J                                                                               | 0                    |                   |
| 6                           | Gomisin J isomer                                                                        | 0                    |                   |
| 7                           | Tigloyl gomisin Q/Angeloyl gomisin                                                      | 0.008                |                   |
| 8                           | Kadsuranin/isomer                                                                       | 0                    |                   |
| 9                           | Kadsuranin/isomer                                                                       | 0.444                |                   |
| 10                          | Tigloyl gomisin Q/Angeloyl gomisin Q                                                    | 0.055                |                   |
| 11                          | Gomisin J isomer                                                                        | 0                    |                   |
| 12                          | Benzoyl isogomisin Q                                                                    | 0.006                |                   |
| 13                          | Tigloyl gomisin Q isomer/Angeloyl gomisin Q isomer                                      | 0.039                |                   |
| 14                          | (-) Gomisin K <sub>1</sub>                                                              | 0                    |                   |
| 15                          | (+) Gomisin K <sub>2</sub>                                                              | 0                    |                   |
| 16                          | Schisantherin B                                                                         | 1.985                |                   |
| 17                          | (-) Gomisin K <sub>1</sub> isomer/(+) Gomisin K <sub>2</sub> isomer                     | 0                    |                   |
| 18                          | Schisantherin A                                                                         | 5.987                |                   |
| 19                          | Schisantherin B isomer                                                                  | 5.811                |                   |
| 20                          | Schisanhenol                                                                            | 0                    |                   |
| 21                          | Gomisin E                                                                               | 0                    |                   |
| 22                          | Schisandrin A                                                                           | 1.719                |                   |
| 23                          | Gomisin N                                                                               | 0                    |                   |
| 24                          | Schisandrin B                                                                           | 0.046                |                   |
| 25                          | Tanshindiol B/Tanshindiol C                                                             | 0.006                |                   |
| 26                          | 1,2,6,7,8,9-Hexahydro-1,6,6-trimethyl-3,11-dioxanaphth[2,1-e]azulene-10,12-dione/isomer | 0.008                |                   |
| 27                          | 1 $\beta$ -Hydroxy cryptotanshinone                                                     | 0.009                |                   |
| 28                          | 1,2-Dihydro-1,6-dimethylfuro[3,2-c]naphth[2,1-e]oxepin-10,12-dione                      | 0.011                |                   |
| 29                          | 6,7,8,9-Tetrahydro-1,6,6-trimethylfuro[3,2-c]naphth[2,1-e]exepine-10,12-dione           | 0.033                |                   |
| 30                          | 6,7,8,9-Tetrahydro-1,6,6-trimethylfuro[3,2-c]naphth[2,1-e]exepine-10,12-dione isomer    | 0.019                |                   |
| 31                          | 1-Oxo cryptotanshinone                                                                  | 0.154                |                   |
| 32                          | Tanshinone II B                                                                         | 0.066                |                   |
| 33                          | Hydroxytanshinone II A/3 $\alpha$ -Hydroxy tanshinone II A                              | 0.080                |                   |
| M1                          | Schisandrin A                                                                           | 2.863                |                   |
| M2                          | Schisandrin A loss of 2CH <sub>2</sub> +demmethylation to carboxylic acid               | 0.029                |                   |
| M3                          | Schisandrin A loss of CH <sub>2</sub> +di-oxidation                                     | 0.327                |                   |
| M4                          | Schisandrin B oxidation                                                                 | 1.980                |                   |

|                    |                                                                           |        |        |
|--------------------|---------------------------------------------------------------------------|--------|--------|
| M5                 | Schisandrin A loss of CH <sub>2</sub> +di-oxidation                       | 0.276  |        |
| M6                 | Schisandrin B loss of CH <sub>2</sub> +di-oxidation                       | 0.055  |        |
| M7                 | Schisandrin A loss of 2CH <sub>2</sub> +demethylation to carboxylic acid  | 5.156  |        |
| M8                 | Schisandrin B oxidation                                                   | 0.176  |        |
| M9                 | Schisandrin A loss of CH <sub>2</sub> +di-oxidation                       | 0.032  |        |
| M10                | Schisandrin B oxidation                                                   | 0.859  |        |
| M11                | Schisandrin A ethyl to carboxylic acid                                    | 2.420  |        |
| M12                | Schisandrin B oxidation                                                   | 0.690  |        |
| M13                | Schisandrin A loss of OCH <sub>2</sub> +carbonyl formation                | 0.457  |        |
| M14                | Schisandrin A demethylation to carboxylic acid                            | 0.142  |        |
| M15                | Schisandrin A loss of OCH <sub>2</sub> +carbonyl formation                | 0.300  |        |
| M16                | Schisandrin A loss of CH <sub>2</sub> +oxidation                          | 0.262  |        |
| M17                | Schisandrin A loss of 2CH <sub>2</sub> +acetylation                       | 4.718  |        |
| M18                | Schisandrin A loss of OCH <sub>2</sub> +carbonyl formation                | 1.983  |        |
| M19                | Schisandrin A loss of CH <sub>2</sub> +oxidation                          | 0.540  |        |
| M20                | Schisandrin A loss of OCH <sub>2</sub> +carbonyl formation                | 0.549  |        |
| M21                | Schisandrin A loss of CH <sub>2</sub> +oxidation                          | 0.451  |        |
| M22                | Schisandrin A loss of OCH <sub>2</sub> +ketone formation                  | 0.207  |        |
| M23                | Schisandrin A loss of OCH <sub>2</sub> +ketone formation                  | 0.109  |        |
| M24                | Schisandrin B methylene to Ketone                                         | 0.031  |        |
| M25                | Schisandrin A loss of OCH <sub>2</sub> +bis-ketone formation              | 0.874  |        |
| M26                | Schisandrin B methylene to Ketone                                         | 0.039  |        |
| M27                | Schisandrin A loss of OCH <sub>2</sub> and CH <sub>2</sub> +acetylation   | 3.196  |        |
| M28                | Schisandrin A loss of 2OCH <sub>2</sub> +demethylation to carboxylic acid | 0.055  |        |
| M29                | Schisantherin B -OCH <sub>2</sub>                                         | 2.384  |        |
| M30                | Schisandrin A loss of 2CH <sub>2</sub>                                    | 0.040  |        |
| M31                | Schisandrin A loss of OCH <sub>2</sub> and CH <sub>2</sub> +acetylation   | 2.689  |        |
| M32                | Schisandrin A loss of OCH <sub>2</sub> +ketone formation                  | 0.059  |        |
| M33                | Schisandrin A loss of 2CH <sub>2</sub> +acetylation                       | 0.400  |        |
| M34                | Schisandrin A loss of OCH <sub>2</sub> +bis-ketone formation              | 0.393  |        |
| M35                | Schisandrin A loss of OCH <sub>2</sub> +bis-ketone formation              | 0.384  |        |
| M36                | Schisandrin A loss of OCH <sub>2</sub> +bis-ketone formation              | 0.797  |        |
| M37                | Schisandrin A loss of CH <sub>2</sub>                                     | 0.710  |        |
| <i>Tanshinones</i> |                                                                           |        |        |
| 34                 | Tanshinone VI                                                             | 1.872  | 40.326 |
| 35                 | 1,2-Dihydro-tanshinquinone I /15,16-Dihydrotanshinone                     | 0.099  |        |
| 36                 | Danshenxinkun B                                                           | 0.004  |        |
| 37                 | Methyl tanshinonate                                                       | 0.006  |        |
| 38                 | Tanshinone I                                                              | 10.453 |        |
| 39                 | Cryptotanshinone                                                          | 7.119  |        |
| 40                 | Unknown                                                                   | 0.004  |        |
| 41                 | Tanshinone II A                                                           | 4.231  |        |
| M38                | Tri-hydroxylation cryptotanshinone                                        | 2.598  |        |

|                             |                                                        |       |        |
|-----------------------------|--------------------------------------------------------|-------|--------|
| M39                         | Hydroxylation tanshinone I                             | 0.400 |        |
| M40                         | Hydroxylation cryptotanshinone                         | 3.617 |        |
| M41                         | Hydroxylation cryptotanshinone                         | 0.172 |        |
| M42                         | Hydroxylation cryptotanshinone                         | 0.249 |        |
| M43                         | Di-hydroxylation cryptotanshinone                      | 0.153 |        |
| M44                         | Di-hydroxylation tanshinone IIA                        | 7.123 |        |
| M45                         | Hydroxylation tanshinone I                             | 0.725 |        |
| M46                         | Di-hydroxylation cryptotanshinone                      | 0.090 |        |
| M47                         | Di-hydroxylation cryptotanshinone                      | 0.522 |        |
| M48                         | Hydroxylation cryptotanshinone                         | 0.098 |        |
| M49                         | Hydroxyl tanshinone IIB                                | 0.433 |        |
| M50                         | Hydroxylation tanshinone II A                          | 0.075 |        |
| M51                         | Di-hydroxylation cryptotanshinone                      | 0.032 |        |
| M52                         | Dehydrogenation tanshinone II A                        | 0.250 |        |
| <i>Flavonoids</i>           |                                                        |       |        |
| 113                         | Vitexin                                                | 0     | 0      |
| 114                         | Calycosin                                              | 0     |        |
| <i>Lactones</i>             |                                                        |       |        |
| 115                         | 3-Butylidenephthalide                                  | 0.469 | 0.806  |
| 116                         | Senkyunolide B/C/E                                     | 0.337 |        |
| <b>In negative ion mode</b> |                                                        |       |        |
| <i>Ginsenosides</i>         |                                                        |       |        |
| 42                          | Unknown                                                | 0.012 | 99.159 |
| 43                          | Re <sub>3</sub>                                        | 0.020 |        |
| 44                          | Unknown                                                | 0.037 |        |
| 45                          | Re <sub>4</sub>                                        | 0.011 |        |
| 46                          | 20-Gluco-ginsenoside Rf                                | 0.063 |        |
| 47                          | Notoginsenoside R1 isomer                              | 0.031 |        |
| 48                          | Re <sub>1</sub>                                        | 0.049 |        |
| 49                          | Notoginsenoside R <sub>1</sub>                         | 0.052 |        |
| 50                          | Re <sub>2</sub>                                        | 0.012 |        |
| 51                          | Unknown                                                | 0.071 |        |
| 52                          | Re                                                     | 9.603 |        |
| 53                          | Rg <sub>1</sub>                                        | 0.407 |        |
| 54                          | Koryoginsenoside R <sub>2</sub> isomer                 | 0.201 |        |
| 55                          | Floralginsenoside P/isomer                             | 0.036 |        |
| 56                          | Koryoginsenoside R <sub>2</sub>                        | 0     |        |
| 57                          | Koryoginsenoside R <sub>2</sub> isomer                 | 0     |        |
| 58                          | Floralginsenoside P/isomer                             | 0.090 |        |
| 59                          | Ginsenoside F <sub>3</sub> /Ginsenoside F <sub>5</sub> | 0.030 |        |
| 60                          | Floralginsenoside P/isomer                             | 0.059 |        |
| 61                          | Floralginsenoside P/isomer                             | 0.021 |        |
| 62                          | Notoginsenoside N isomer                               | 0.468 |        |

|     |                                                           |        |
|-----|-----------------------------------------------------------|--------|
| 63  | Notoginsenoside N                                         | 0.340  |
| 64  | Vinaginsenoside R <sub>4</sub>                            | 0.212  |
| 65  | Unknown                                                   | 0      |
| 66  | Unknown                                                   | 0      |
| 67  | Rf isomer                                                 | 0.048  |
| 68  | Rf                                                        | 2.719  |
| 69  | Unknown                                                   | 0      |
| 70  | Notoginsenoside R <sub>2</sub>                            | 0.096  |
| 71  | Ra <sub>2</sub>                                           | 0.062  |
| 72  | Ra <sub>3</sub>                                           | 0.239  |
| 73  | Rb <sub>1</sub>                                           | 20.768 |
| 74  | Ro isomer                                                 | 0.069  |
| 75  | Rg <sub>2</sub>                                           | 3.806  |
| 76  | Ra <sub>1</sub>                                           | 0.082  |
| 77  | Rc                                                        | 11.740 |
| 78  | 20(R)-Rg <sub>2</sub>                                     | 0.552  |
| 79  | Ro                                                        | 0.818  |
| 80  | Rh <sub>1</sub>                                           | 0.070  |
| 81  | Ro isomer                                                 | 0.635  |
| 82  | Rb <sub>2</sub>                                           | 1.301  |
| 83  | Rb <sub>3</sub>                                           | 0.807  |
| 84  | Quinquenoside R <sub>1</sub>                              | 0.133  |
| 85  | Rb <sub>1</sub> isomer                                    | 0      |
| 86  | Pseudo-ginsenoside-RT <sub>1</sub> /Chikusetsusaponin IV  | 0      |
| 87  | Rs <sub>2</sub>                                           | 0.073  |
| 88  | Rd                                                        | 18.090 |
| 89  | Malonyl-ginsenoside Rd                                    | 0      |
| 90  | Quinquenoside R <sub>1</sub> isomer                       | 0      |
| 91  | Acetyl-Rg <sub>2</sub>                                    | 0      |
| 92  | Rd isomer                                                 | 1.542  |
| 93  | Acetyl-Rd/isomer                                          | 0      |
| 94  | Ginsenoside Ro methyl ester                               | 0.044  |
| 95  | Gypenoside X VII                                          | 0      |
| 96  | Vinaginsenoside R <sub>16</sub>                           | 0.057  |
| 97  | Pseudo-ginsenoside RC <sub>1</sub>                        | 0      |
| 98  | Gypenoside IX                                             | 0      |
| 99  | Notoginsenoside Fe                                        | 0.116  |
| 100 | Acetyl-gypenoside X VII                                   | 0      |
| 101 | Acetyl-gypenoside X VII isomer                            | 0      |
| 102 | Pseudo-ginsenoside-RT1 isomer/Chikusetsusaponin IV isomer | 0.743  |
| 103 | Chikusetsusaponin IVa                                     | 6.131  |
| 104 | Ginsenoside F <sub>2</sub>                                | 0.638  |
| 105 | Rg <sub>3</sub>                                           | 6.452  |

|                                            |                                                    |       |       |
|--------------------------------------------|----------------------------------------------------|-------|-------|
| 106                                        | (20 <i>R</i> )-Rg <sub>3</sub>                     | 2.062 |       |
| 107                                        | Acetyl-( <i>S/R</i> )-Rg <sub>3</sub> /isomer      | 0     |       |
| 108                                        | Acetyl-( <i>S/R</i> )-Rg <sub>3</sub> /isomer      | 0     |       |
| 109                                        | Polyacetyleneginsenoside-Ro/isomer                 | 0     |       |
| 110                                        | Polyacetyleneginsenoside-Ro/isomer                 | 0     |       |
| 111                                        | Rh <sub>2</sub>                                    | 0     |       |
| 112                                        | 20( <i>R</i> )-Rh <sub>2</sub>                     | 0     |       |
| M53                                        | Monooxygenated Rb <sub>1</sub>                     | 0.136 |       |
| M54                                        | F <sub>1</sub> /isomer                             | 0.044 |       |
| M55                                        | Ra <sub>3</sub> -Xyl                               | 2.688 |       |
| M56                                        | Rd isomer                                          | 0.081 |       |
| M57                                        | Rd isomer                                          | 0     |       |
| M58                                        | F <sub>1</sub> /isomer                             | 0.108 |       |
| M59                                        | Rd isomer                                          | 0     |       |
| M60                                        | Ro-Glc                                             | 1.471 |       |
| M61                                        | Ro-2Glc                                            | 2.913 |       |
| M62                                        | Ro isomer-2Glc                                     | 0     |       |
| <i>Phenolicacids and triterpenoid acid</i> |                                                    |       |       |
| 117                                        | Salvianolic acid A                                 | 0     | 0     |
| 118                                        | Salvianolic acid B                                 | 0     |       |
| 119                                        | Ursolic acid/Oleanlic acid                         | 0     |       |
| <i>Astragalus saponins</i>                 |                                                    |       |       |
| 120                                        | Cyclocanthoside E                                  | 0     | 0.841 |
| 121                                        | Astragaloside V/Astragaloside VI/Astragaloside VII | 0     |       |
| 122                                        | Astragaloside IV                                   | 0.841 |       |
